1 **Plasticity in novel environments induces larger changes in genetic variance than adaptive divergence**

2 *Greg M. Walter<sup>1,2\*</sup>, Delia Terranova<sup>3</sup>, James Clark<sup>1,4</sup>, Salvatore Cozzolino<sup>5</sup>, Antonia Cristaudo<sup>3</sup>, Simon J.*  
3 *Hiscock<sup>4</sup> and Jon R. Bridle<sup>1,6</sup>*

4 <sup>1</sup>University of Bristol, School of Biological Sciences, Bristol BS8 1TQ, UK

5 <sup>2</sup>Current address: Monash University, School of Biological Sciences, Melbourne 3800, Australia

6 <sup>3</sup>University of Catania, Department of Biological, Geological and Environmental Sciences, Catania 95128,  
7 Italy

8 <sup>4</sup>University of Oxford, Department of Plant Sciences, Oxford, OX1 3RB, UK

9 <sup>5</sup>University of Naples Federico II, Department of Biology, Naples 80126, Italy

10 <sup>6</sup>Current address: University College London, Department of Genetics, Evolution and Environment, London  
11 WC1E 6BT, UK

12 \* Corresponding Author: Greg M. Walter

13 Email: [greg.walter@monash.edu](mailto:greg.walter@monash.edu)

14 Phone: +61 415 246 846

15

16 **Abstract**

17 Genetic correlations between traits are expected to constrain the rate of adaptation by concentrating genetic  
18 variation in certain phenotypic directions, which are unlikely to align with the direction of selection in novel  
19 environments. However, if genotypes vary in their response to novel environments, then plasticity could  
20 create changes in genetic variation that will determine whether genetic constraints to adaptation arise. We  
21 tested this hypothesis by mating two species of closely related, but ecologically distinct, Sicilian daisies  
22 (*Senecio*, Asteraceae) using a quantitative genetics breeding design. We planted seeds of both species across  
23 an elevational gradient that included the native habitat of each species and two intermediate elevations, and  
24 measured eight leaf morphology and physiology traits on established seedlings. We detected large significant  
25 changes in genetic variance across elevation and between species. Elevational changes in genetic variance  
26 within species were greater than differences between the two species. Furthermore, changes in genetic  
27 variation across elevation aligned with phenotypic plasticity. These results suggest that to understand  
28 adaptation to novel environments we need to consider how genetic variance changes in response to  
29 environmental variation, and the effect of such changes on genetic constraints to adaptation and the evolution  
30 of plasticity.

31 **Keywords:** adaptive divergence, additive genetic variance, covariance tensor, evolutionary rescue, genotype-  
32 by-environment interactions, G-matrix, novel environments, phenotypic plasticity

33

## 34 **Introduction**

35 Populations maintain resilience in response to novel environments if selection on existing genetic variation  
36 (G) increases fitness over generations to create adaptation (termed 'evolutionary rescue'; Gomulkiewicz and  
37 Holt 1995; Bell and Gonzalez 2009), or if the novel environment induces plastic changes for all genotypes  
38 (E) that can maintain fitness (Via et al. 1995; Charmantier et al. 2008). In understanding population  
39 responses to novel environments, studies often focus on the dichotomy of plasticity versus adaptation for  
40 maintaining fitness and avoiding extinction. However, if genotypes vary in their sensitivity to the  
41 environment, then genotype-by-environment interactions (G×E) underlying plasticity can change the amount  
42 of genetic variation available to selection in novel environments (Wood and Brodie III 2015). Where  
43 plasticity can no longer maintain fitness, the potential to persist in a novel environment will then be  
44 determined by the extent to which G×E underlying plasticity changes genetic variation, and whether rapid  
45 adaptation can ensue (Ghalambor et al. 2007).

46 The additive genetic variance-covariance matrix (**G**) describes the genetic architecture underlying  
47 multivariate phenotypes (Lande 1979). Genetic correlations between traits are expected to concentrate  
48 genetic variation in certain directions of the multivariate phenotype. If pleiotropy (or close linkage) underlies  
49 genetic correlations, then any genetic changes in one trait will affect other traits similarly and **G** will be  
50 stable, which will constrain adaptation when genetic variation lies in directions of the phenotype that differ to  
51 selection (Lande 1980; Cheverud 1984; Arnold 1992; Arnold et al. 2008; Walsh and Blows 2009; Chenoweth  
52 et al. 2010). However, if **G** changes in response to environmental variation, then G×E can determine the  
53 availability of genetic variation in the direction of selection in novel environments, which will then determine  
54 whether constraints to adaptation arise (Wood and Brodie III 2015), and therefore the potential for  
55 evolutionary rescue.

56 Although **G** is expected to remain stable, at least in the short term (Zeng 1988), evidence suggests that **G** can  
57 change during adaptive divergence (Doroszuk et al. 2008; Eroukhmanoff and Svensson 2011; McGlothlin et  
58 al. 2018; Walter et al. 2018) and in response to environmental variation (Wood and Brodie III 2015;  
59 Johansson et al. 2020). Evidence also suggests that plasticity in novel environments occurs along phenotypic  
60 axes containing large amounts of genetic variation (Noble et al. 2019). However, we do not know whether, or  
61 to what extent, shifts in **G** are associated with plasticity in novel environments. If plasticity creates changes  
62 in **G**, then such changes in genetic variance can determine the potential for rapid adaptation to maintain  
63 ecological resilience in novel environments. Therefore, by quantifying whether changes in **G** occur across  
64 environments, and whether such changes align with plasticity, we can better understand how genetic  
65 variation present in natural populations can respond to novel environments.

66 G-matrices can differ in the amount of variance in each trait, as well as in the genetic covariance between  
 67 traits. **Fig 1a-d** presents an example of how G-matrices for a hypothetical population could change across  
 68 two environments (A and B). Differences between two matrices can be captured by  $C = G_A - G_B$ , where  $C$  is  
 69 the matrix representing variance that is unique to each G-matrix (**Fig. 1b**). Eigenvectors of  $C$  then quantify  
 70 axes that describe the differences in genetic variance between the two original matrices (**Fig. 1c**). Using the  
 71 eigenvectors of  $C$  (i.e. the tensor of two matrices), we can test whether differences in  $G$  align with plastic  
 72 changes in mean phenotype across environments (**Fig. 1d**). Such an alignment would provide evidence that  
 73 genotype-by-environment interactions underlying plasticity can change  $G$ , and determine future evolutionary  
 74 responses to novel environments.

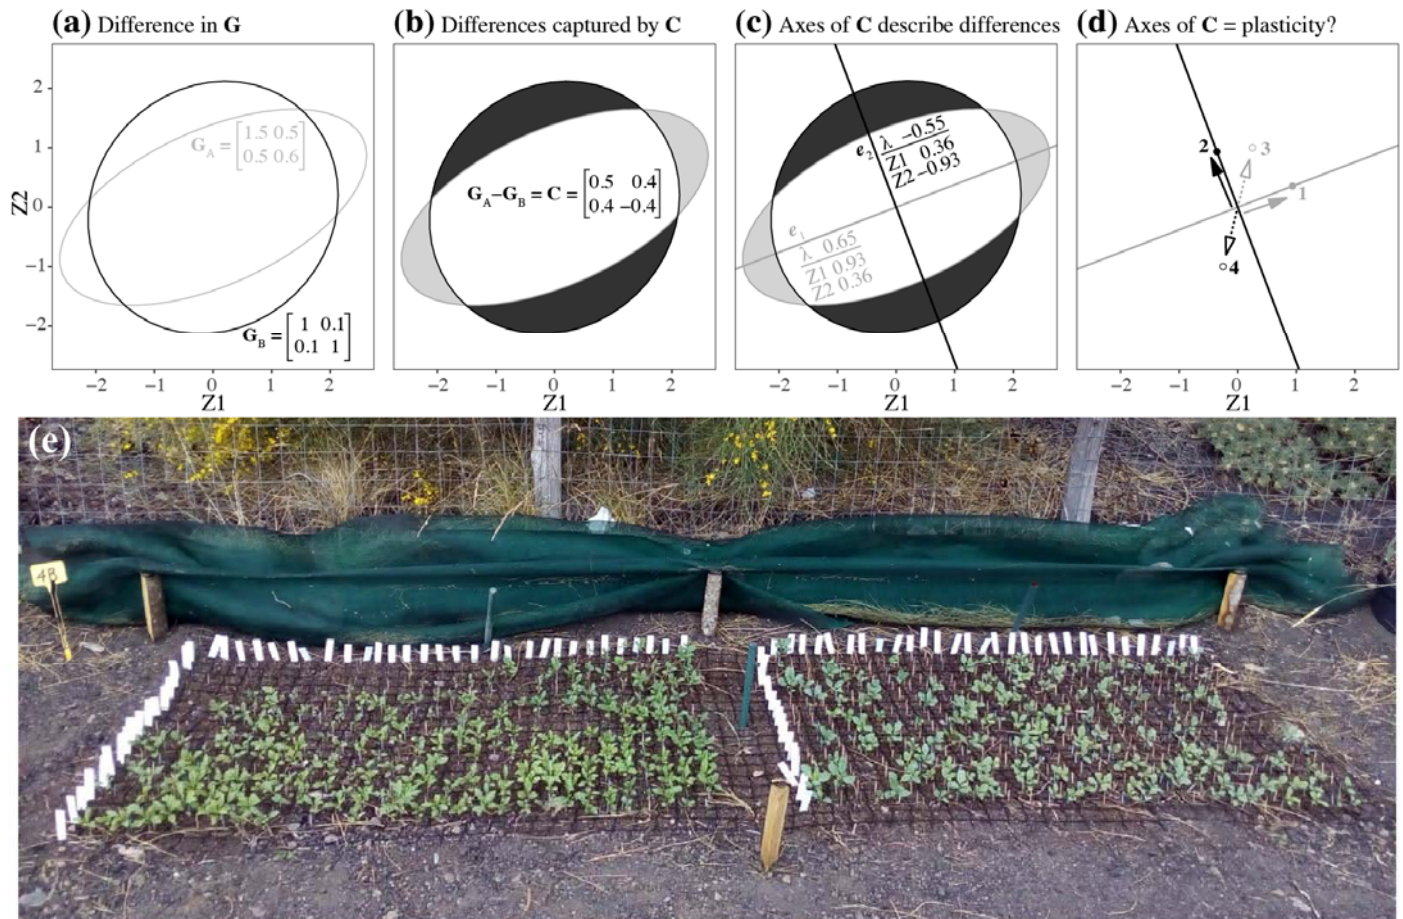

75  
 76 **Fig. 1 (a-d)** Conceptual diagram demonstrating, for two traits (Z1 and Z2), how differences in  $G$  for the same population exposed  
 77 to two environments (A and B) can be quantified with a two-matrix tensor, and then related to plasticity (change in mean  
 78 phenotype). (a) Hypothetical G-matrices are presented in the inset matrices, and visualised as two-dimensional ellipses ( $G_A$  in  
 79 gray, and  $G_B$  in black). The G-matrices for the two environments (inset tables) differ in shape due to different variances (along the  
 80 diagonal) and differences in covariances (off-diagonal). (b) Differences in  $G$  are represented by the gray shading for genetic  
 81 variance unique to environment A, and black shading for genetic variance unique to environment B. These differences in genetic  
 82 variance can be quantified using  $C = G_A - G_B$ , which has a positive difference in genetic variance in Z1 (0.5) due to greater

83 genetic variance in Z1 for environment A. By contrast, Z2 has a negative genetic variance (-0.4) because environment B has  
84 greater genetic variance in Z2. (c) Decomposing C identifies the two major axes (eigenvectors, which in this case are equivalent to  
85 eigentensors), which are presented in the inset tables and represented by the black and gray lines. Each eigenvector describes  
86 genetic variance that differs between the original matrices (eigenvalues represented by  $\lambda$ ), with the loadings of the traits describing  
87 how each trait contributes to the differences in genetic variance described by each eigenvector. The first axis ( $e_1$ ) describes a  
88 positive eigenvalue representing differences in genetic variance unique to environment A (gray shading along the gray line). The  
89 second axis ( $e_2$ ) describes negative variance describing differences due to genetic variance unique to environment B (black shading  
90 along the black line). (d) Changes in mean phenotype are represented by arrows and circles. If differences in genetic variance  
91 underlie plasticity, we expect changes in mean phenotype along an axis representing genetic variance unique to either environment  
92 A (point 1 and solid gray arrow), or environment B (point 2 and black arrow). However, if differences in genetic variance are not  
93 associated with plastic responses to the two environments, then changes in mean phenotype would occur along an axis different to  
94 changes in genetic variance (points 3 or 4, and dashed lines with unfilled arrows). (e) An example of a seedling block at 2,000m,  
95 eight weeks after seeds were planted (*S. chrysanthemifolius* on left).

96

97 To test whether genotype-by-environment interactions create changes in genetic variance, we reciprocally  
98 planted seeds of two ecologically contrasting, but closely related *Senecio* species across an elevational  
99 gradient. *Senecio chrysanthemifolius* is a short-lived perennial with dissected leaves that occupies disturbed  
100 habitats in the foothills of Mt. Etna (c.400-1,000 m.a.s.l [metres above sea level]), as well as across Sicily.  
101 *Senecio aethnensis* is a perennial with entire glaucous leaves endemic to lava flows above 2,000m.a.s.l on  
102 Mt. Etna, where individuals grow back each spring after being covered by snow in winter. The data we  
103 analyse here are derived from an experiment where we mated among individuals within each species using a  
104 quantitative genetics breeding design (Walter et al. 2021). We then reciprocally planted seeds (from each  
105 family in the breeding design) of both species across an elevational gradient representing the home range of  
106 each species, the edge of their range, and conditions outside their range (**Fig. 1e**). Previously we found  
107 evidence for fitness trade-offs as differences in survival at elevational extremes, indicating specialisation of  
108 each species to their native environment (Walter et al. 2021).

109 Here, we continue the analysis of the transplant experiment by including data on leaf morphology and  
110 pigment traits, and testing whether genetic variance changes between species and across elevation.  
111 Specifically, we test whether: 1) Seedlings show plasticity in novel environments that moves the phenotype  
112 towards that of the native species, 2) Elevation or species differences are associated with larger changes in **G**,  
113 and 3) Changes in **G** for each species aligned with the direction of plasticity as the elevational change in  
114 mean phenotype.

115

## 116 **Methods and materials**

117 We only briefly describe the field experiment here, but refer the reader to the previous analysis where it is  
118 presented in detail (Walter et al. 2021). We collected cuttings from naturally growing individuals, which we  
119 propagated. We randomly assigned each individual as a sire (male) or dam (female) and mated each sire to  
120 three dams (*S. aethnensis*  $n=36$  sires,  $n=35$  dams,  $n=94$  full-sibling families; *S. chrysanthemifolius*  $n=38$   
121 sires,  $n=38$  dams,  $n=108$  full-sibling families).

122 We then planted 100 seeds from each family at four elevations on Mt. Etna that included the native habitats  
123 of both species (500m and 2,000m) as well as two intermediate elevations (1,000m and 1,500m). We planted  
124 25 seeds at each site, randomised into five experimental blocks (*S. aethnensis*  $n=432$  seeds/block,  $n=2,160$   
125 seeds/site; *S. chrysanthemifolius*  $n=540$  seeds/block,  $n=2,700$  seeds/site; Total  $N=19,232$  seeds). To prepare  
126 each experimental block, we cleared the ground of plant matter and debris, and then placed a plastic grid on  
127 the ground with 4cm square cells. We attached each seed to the middle of a toothpick using non-drip super  
128 glue and then pushed each toothpick into the soil so that the seed sat 1-2mm below the soil surface. To  
129 replicate natural germination conditions, we suspended 90% shade-cloth 20cm above each plot and kept the  
130 seeds moist until germination ceased (2-3 weeks). After this shade-cloth was removed and watering reduced.

131 When  $>80\%$  of plants had produced ten leaves at each transplant site, we collected the 5<sup>th</sup> and 6<sup>th</sup> leaves from  
132 the base of the plant to quantify morphology and leaf pigment content. In total, we measured 6,454 plants  
133 (500m  $n=2,369$ ; 1,000m  $n=1,929$ ; 1,500m  $n=1,030$ ; 2,000m  $n=1,126$ ), which included more than two  
134 individuals for  $>90\%$  of the full-sibling families at each elevation (average number of individuals measured  
135 per family: 500m= $11.73\pm 5.5$ [one standard deviation], 1,000m= $9.55\pm 3.7$ , 1,500m= $5.10\pm 2.8$ ,  
136 2,000m= $5.57\pm 3.1$ ). This meant that all sires were measured at each site, and that mortality should not  
137 influence the estimation of genetic variance. To quantify leaf pigment content, we used a Dualex instrument  
138 (Force-A, France) to estimate the chlorophyll, flavonol and anthocyanin content of each leaf. To measure leaf  
139 morphology, we scanned the leaves (Canoscan 9000F) and quantified morphology using the software Lamina  
140 (Bylesjo et al. 2008), which produced leaf morphology traits that included leaf area, leaf complexity  
141 ( $\frac{\text{leaf perimeter}^2}{\text{leaf area}}$ ), the width of leaf indents, and the number of leaf indents standardised by perimeter. We then  
142 weighed the leaves of each plant and calculated specific leaf area ( $SLA = \frac{\text{leaf area}}{\text{leaf weight}}$ ). To analyse phenotype  
143 data, we used R (v.3.6.1; R Core Team 2019 ) for all analyses. Prior to analysis, we standardised each trait by  
144 their mean so that traits measured on different scales could be compared (Hansen and Houle 2008).

### 145 *1. Species differences in plasticity across elevation*

146 To quantify species differences in phenotypic plasticity across the elevational gradient, we used a

147 Multivariate Analysis of Variance (MANOVA), which tested for significant differences in mean multivariate  
148 phenotype across elevation. We included all eight phenotypic traits as the multivariate response variable.  
149 Elevation, species and their interaction were included as fixed effects. To visualise how the two species  
150 differed across elevation we first constructed a D-matrix, the covariance matrix representing differences in  
151 mean multivariate phenotype between species and across elevation (see glossary in **Table 1**). To construct **D**,  
152 we extracted the Sums of Squares and Cross-Product (SSCP) matrices for each fixed effect ( $SSCP_S =$   
153  $species$ ;  $SSCP_E = elevation$ ;  $SSCP_{S \times E} = species \times elevation$ ) and the error term ( $SSCP_R$ ). We then estimated  
154  $SSCP_H$  ( $SSCP_H = SSCP_S + SSCP_E + SSCP_{S \times E}$ ), which calculates the difference in mean across all elevations  
155 for both species. We calculated Mean Square (MS) matrices by dividing the SSCP matrices by their  
156 corresponding degrees of freedom ( $MS_H = \frac{SSCP_H}{7}$ ;  $MS_E = \frac{SSCP_E}{6,446}$ ). We then estimated **D** using

$$157 \quad \mathbf{D} = \frac{MS_H - MS_E}{nf}, \quad (1)$$

158 where  $nf$  represents the average number of individuals measured for each species at each elevation,  
159 calculated from equation 9 in Martin et al. (2008). We used the eigenvectors of **D** to visualise differences in  
160 multivariate phenotype across elevation for both species.

## 161 2. Quantifying species and elevational differences in genetic variance

162 Estimation of additive genetic variance: The additive genetic (co)variance matrix (**G**) represents the  
163 multivariate genetic variance underlying morphological traits. To calculate **G** for each species at each  
164 elevation, we used the package *MCMCglmm* (Hadfield 2010) and implemented the multivariate linear mixed  
165 model

$$166 \quad y_{ijkl} = s_{i(j)} + d_{j(i)} + b_k + e_{l(ijk)}, \quad (2)$$

167 where  $s_{i(j)}$  represents the  $i$ th sire mated to the  $j$ th dam,  $d_{j(i)}$  the  $j$ th dam mated to the  $i$ th sire,  $b_k$  as the  
168 variance among blocks within a transplant site and  $e_{l(ijk)}$  the residual error. The eight normally distributed  
169 phenotypic traits were included as the multivariate response variable ( $y_{ijkl}$ ). We applied equation 2  
170 separately to each species and transplant elevation, resulting in the estimation of eight G-matrices. For each  
171 implementation, we extracted the sire variance component and multiplied it by four to calculate our observed  
172 G-matrices (Lynch and Walsh 1998).

173 We implemented equation 2 using chains with a burn-in of 300,000 iterations, a thinning interval of 1,500  
174 iterations and saving 2,000 iterations that provided the posterior distribution for all parameters estimated. We  
175 confirmed model convergence by checking that the chains mixed sufficiently well and that autocorrelation

176 was lower than 0.05, and that our parameter-expanded prior was uninformative.

177 To test whether our experimental design captured biologically meaningful estimates of genetic variance, for  
 178 each implementation of equation 2, we randomised offspring among sires and dams, and re-applied the  
 179 model to the randomised data. To maintain differences among the experimental blocks, we randomised the  
 180 parentage of offspring within each block separately. We conducted 1,000 randomisations for each observed  
 181 G-matrix, which we used to estimate our randomised G-matrices representing the null distribution for our  
 182 estimation of **G**. Observed estimates of genetic variance that exceed the null distribution provides strong  
 183 evidence that our estimates of genetic variance are statistically significant.

184 **Table 1** Glossary of quantitative genetics terms

| Term                                       | Sym-<br>bol | Definition                                                                                                                                                                                                                          |
|--------------------------------------------|-------------|-------------------------------------------------------------------------------------------------------------------------------------------------------------------------------------------------------------------------------------|
| D-matrix                                   | <b>D</b>    | The variance-covariance matrix of mean phenotype. This captures how a group of traits differs in multivariate mean among levels of a covariate (e.g., elevation)                                                                    |
| G-matrix                                   | <b>G</b>    | The additive genetic variance-covariance matrix underlying a set of traits. Genetic variances on the diagonal and genetic covariances among traits off the diagonal                                                                 |
| $d_{\max}$                                 |             | The first eigenvector of <b>D</b> , representing the axis along which the greatest differences in mean multivariate phenotype lie                                                                                                   |
| $g_{\max}$                                 |             | The first eigenvector of <b>G</b> , representing the axis that describes the direction containing the greatest amount of additive genetic variance                                                                                  |
| Sire variance                              |             | If a group of randomly selected sires are each mated to multiple dams in a breeding design, the variance among the sires represents 1/4 of the additive genetic variance after accounting for variance among dams and full-siblings |
| S-matrix                                   | <b>S</b>    | A symmetric matrix used for a tensor analysis. <b>S</b> describes the element-by-element differences among the original matrices                                                                                                    |
| Eigentensor                                | <b>E</b>    | Orthogonal axes describing differences among the original matrices. Eigentensors are constructed by scaling and arranging eigenvectors of <b>S</b>                                                                                  |
| Eigenvector ( $n$ ) of eigentensor ( $p$ ) | $e_{p,n}$   | The set of $n$ eigenvectors that describe the $p$ th eigentensor. Trait loadings describe how each trait contributes to differences among the original matrices that are captured by the eigenvector of an eigentensor.             |
| Coordinates of an eigentensor              |             | The correlation between the original matrices and each eigentensor. Quantifies which matrices contribute to the differences among all matrices that are captured by an eigentensor.                                                 |

185



186

187 *Quantifying differences in genetic variance:* To quantify differences in  $\mathbf{G}$ , we used a covariance tensor  
188 approach (see glossary in **Table 1**). The strength of this approach is that, unlike other methods that focus on  
189 pairwise comparisons, the covariance tensor can simultaneously compare multiple matrices. This simply  
190 extends the two-matrix example (presented in **Fig. 1a-c**) to three or more matrices. The covariance tensor  
191 quantifies differences among multiple matrices by first quantifying a matrix (the  $\mathbf{S}$ -matrix) that captures the  
192 raw differences among all matrices, and then identifying how each of the original traits and matrices  
193 contribute to the differences captured by  $\mathbf{S}$ . We only briefly describe the approach here, and refer readers to  
194 more detailed descriptions in Bassler and Pajevic (2007); Hine et al. (2009); Aguirre et al. (2014); Walter et  
195 al. (2018), and a simplified description (**Fig. S4**). The covariance tensor is based on decomposition (i.e.  
196 eigenanalysis, which is analogous to principal components) of symmetric matrices to construct a set of  
197 orthogonal axes, known as eigentensors, which are used to identify and describe differences in the original  
198 matrices being compared (e.g., elevation).

199 First, a symmetric matrix ( $\mathbf{S}$ ) is calculated, whose elements represent element-by-element variation among  
200 the original matrices. Decomposing  $\mathbf{S}$  identifies the orthogonal axes (eigenvectors) along which the original  
201 matrices differ the most. Eigenvectors are scaled and rearranged to calculate the eigentensors, which are used  
202 to identify how the original traits and matrices contributed to differences among all matrices. To identify  
203 whether the observed eigentensors described significant differences in genetic variance, we constructed a null  
204 distribution by randomising sire breeding values among treatments (here, elevations), and calculating a  
205 randomised  $\mathbf{G}$ -matrix for each MCMC iteration from the observed models. This calculates a null-distribution  
206 based on the structure of the observed  $\mathbf{G}$ -matrices (Aguirre et al. 2014). However, as suggested by Morrissey  
207 et al. (2019), we also tested for significant eigentensors by randomising the sires among species and  
208 elevations in the original dataset and re-implementing equation 2 on each randomisation. If the observed  
209 eigentensors described greater differences in genetic variance than the eigentensors constructed from the null  
210 distribution, then there is strong evidence for significant differences in our observed  $\mathbf{G}$ .

211 To identify how each matrix (in our case, one elevation for a given species) contributes to differences among  
212 all matrices (all elevations for a given species), the matrix coordinates of the eigentensors are calculated. The  
213 coordinates are linear combination scores that are calculated between each eigentensor and the original  
214 matrices, and can be interpreted similarly to a principal components analysis: larger scores indicate a greater  
215 correlation between any given matrix and the differences among matrices described by that particular  
216 eigentensor.

217 To identify how the original traits contribute to differences among matrices, each eigentensor is decomposed,  
218 and the eigenvectors interpreted in the same fashion as a principal components analysis. Traits with large  
219 loadings contribute to the differences described by the eigenvector of a particular eigentensor. Traits with  
220 loadings of different signs (positive and negative) describe traits that contribute to the differences in opposite  
221 ways. To identify how strongly each of the original matrices are associated with each eigenvector, we can use  
222 the matrix projection

$$223 \quad V_{ijk} = \mathbf{e}_{ij}^T \mathbf{G}_k \mathbf{e}_{ij}, \quad (3)$$

224 where the  $V_{ijk}$  quantifies the amount of variance in the  $\mathbf{G}$ -matrix from the  $k$ th elevation that is described by  
225 the  $j$ th eigenvector from the  $i$ th eigentensor ( $\mathbf{e}_{i,j}$ ). Greater values of  $V_{ijk}$  for any given matrix suggest that  
226 differences in that particular matrix underlie the differences in genetic variance captured by that eigenvector  
227 of the eigentensor.

228 We used the covariance tensor approach to make two comparisons. First, to identify whether elevation or  
229 adaptive divergence (i.e. differences between species) created larger differences in  $\mathbf{G}$ , we compared the  $\mathbf{G}$ -  
230 matrices of the two elevational extremes for both species. If adaptive divergence (i.e. exposure to different  
231 environments during the process of ecological speciation) created greater changes in  $\mathbf{G}$  than exposure to  
232 current environmental variation (i.e. to the elevational gradient), then differences between species would be  
233 greater than differences across elevation. Second, to identify the extent of elevational changes in  $\mathbf{G}$ , we  
234 quantified changes in  $\mathbf{G}$  across elevation for each species separately.

### 235 *3. Testing whether elevational changes in genetic variance are associated with plasticity*

236 To test whether elevational changes in  $\mathbf{G}$  were associated with plasticity (change in mean phenotype), we  
237 compared the eigenvectors of eigentensors (capturing differences in  $\mathbf{G}$ ) with a  $\mathbf{D}$ -matrix representing  
238 multivariate change in phenotype across elevation. First, we conducted MANOVA as before, but for each  
239 species separately, and including experimental block (within elevation) as the error term, which tests whether  
240 elevational differences in mean multivariate phenotype are significantly greater than differences among  
241 blocks within elevation. We then used the output of the MANOVA to calculate a  $\mathbf{D}$ -matrix that captured the  
242 elevational change in mean phenotype for each species. Second, we used matrix projection (equation 3), to  
243 project the eigenvectors of eigentensors through the  $\mathbf{D}$ -matrix for each species separately. We predicted that  
244 if  $\mathbf{G} \times \mathbf{E}$  underlying plasticity can change the structure of  $\mathbf{G}$ , then eigenvectors (of eigentensors) that describe  
245 the largest differences in  $\mathbf{G}$  would also describe large changes in mean multivariate phenotype.

246 Estimating  $\mathbf{G} \times \mathbf{E}$  across elevation: We tested whether plasticity was associated with  $\mathbf{G} \times \mathbf{E}$  as a change in  
247 variance or as changes in rank of sire breeding values across elevation. We calculated the scores for the

248 first two eigenvectors of **D** (from equation 1) and used equation 2 to estimate the genetic variance at each  
249 elevation, and the genetic covariance among elevations. For each random component, we specified random  
250 slopes and intercepts for elevation. To specific the correct residual variance structure, we only estimated the  
251 residual variances at each elevation because two plants were not present at more than one elevation,  
252 preventing the estimation of residual covariance among elevations.

253

## 254 **Results**

### 255 *1. Species differed in their change in mean phenotype across elevation*

256 The MANOVA provided evidence that species (Wilks'  $\lambda = 0.21$ ,  $F_{1,6446} = 2940.56$ ,  $P < 0.0001$ ), elevation  
257 (Wilks'  $\lambda = 0.30$ ,  $F_{3,6446} = 401.12$ ,  $P < 0.0001$ ) and their interaction (Wilks'  $\lambda = 0.83$ ,  $F_{3,6446} = 50.62$ ,  
258  $P < 0.0001$ ) all showed significant differences in mean multivariate phenotype. Changes in the univariate trait  
259 means are presented in **Fig. S2**. We used the MANOVA to estimate a D-matrix representing differences in  
260 mean multivariate phenotype between species and across elevation. We found that *S. chrysanthemifolius*  
261 shows a relatively gradual change in phenotype across elevation (**Fig. 2**). By contrast, *S. aethnensis* shows a  
262 sharper change in mean phenotype whereby the highest elevation (i.e., the native elevation) contrasts with all  
263 three lower elevations (**Fig. 2**).

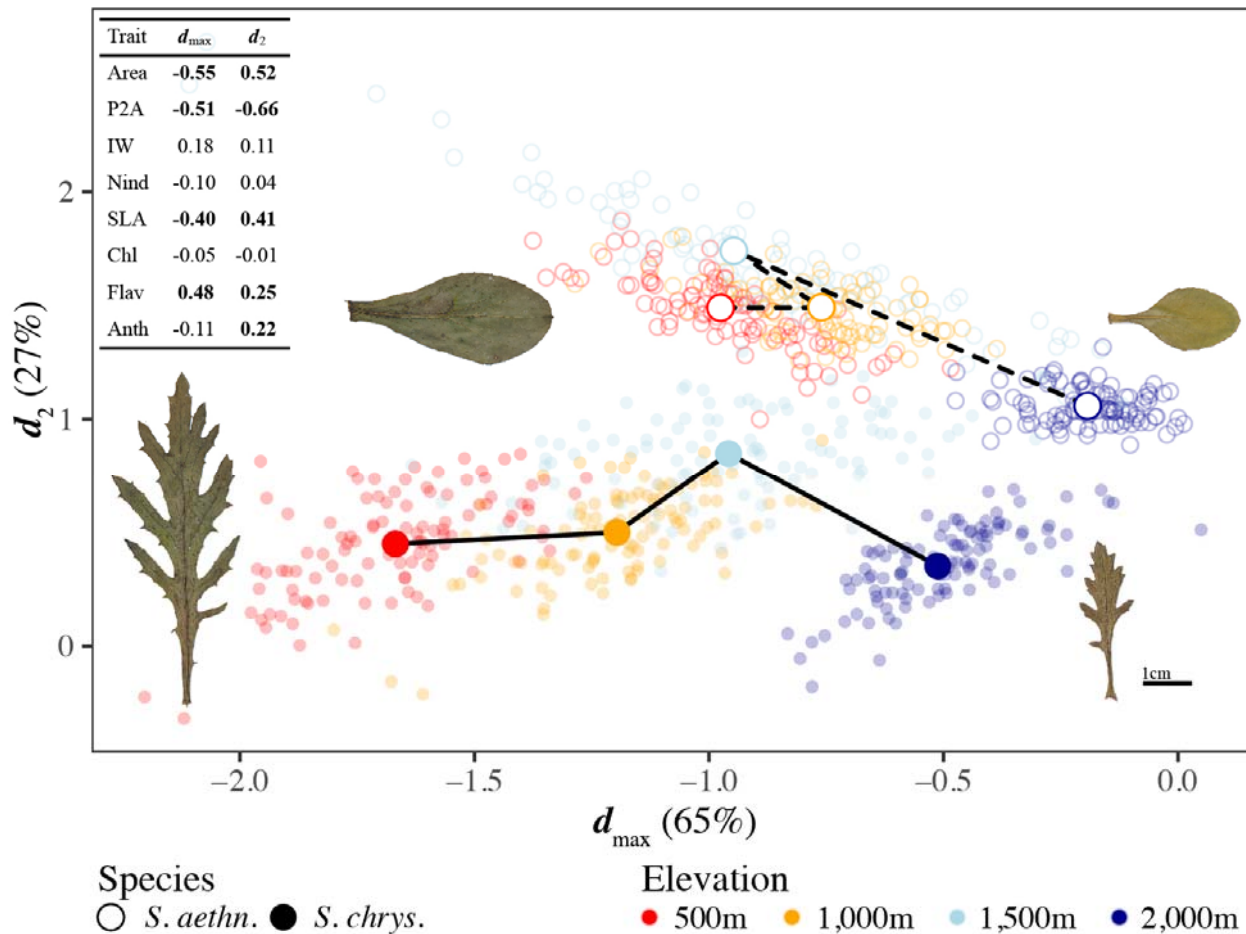

264  
 265 **Fig. 2** Phenotypic plasticity creates large changes in mean multivariate phenotype. The first two axes of **D** together represent 92%  
 266 of all change in mean phenotype, with the table inset displaying the trait loadings for each axis (loadings in bold contribute  
 267 substantially to each axis). Large coloured circles represent the mean of each species at each transplant site, with the size of the  
 268 circle exceeding one standard error. Small circles represent the mean for each full-sibling family. Inset leaves represent a plant near  
 269 the mean phenotype of each species for the elevational extremes.

270  
 271 *2. Genetic variance changed more across elevation than between species*

272 We quantified G-matrices for each species and at each elevation (**Table S2**), and decomposed each matrix to  
 273 identify the orthogonal axes (known as eigenvectors) that describe the distribution of genetic variance within  
 274 each G-matrix (**Table 2**). The first four eigenvectors of **G** together described more than 80% of all genetic  
 275 variance (**Table 2**), and were greater than expected under random sampling (**Fig. S2**), which suggests that  
 276 our matrices captured biologically meaningful genetic variance underlying morphology. G-matrices can  
 277 differ in size (the total amount of genetic variance), shape or orientation. If all traits are genetically  
 278 independent, all axes of a G-matrix will describe a similar amount of genetic variance, and the matrix will be  
 279 spherical. However, the shape of a G-matrix becomes more elliptical when genetic correlations among traits  
 280 condense genetic variance into fewer axes (than the number of traits) that contain higher proportions of the

281 total genetic variance. Differences in shape arise when matrices are more or less elliptical. Differences in  
282 orientation arise when the linear combination of traits that are used to describe the major axes of genetic  
283 variance differ between matrices.

284 Compared to the **G**-matrices estimated at the three lower elevations (500m-1,500m), we found that the **G**-  
285 matrices of both species were smaller (i.e., contained less genetic variance) at the highest elevation (**Table 2**  
286 and **Table S2**). *Senecio aethnensis* showed a similar shape across elevation, whereby three axes consistently  
287 described >80% of the genetic variance at each elevation (**Table 2**). By contrast, **G**-matrices of *S.*  
288 *chrysanthemifolius* were more elliptical at lower elevations (two axes described >70% of total genetic  
289 variance), and much more spherical at the highest elevation (four axes described 80% of total genetic  
290 variance). For both species the magnitude and sign (positive vs negative) of trait loadings changed across  
291 elevation (**Table 2**), suggesting that different linear combinations of traits described axes of **G** at different  
292 elevations.

293

294 **Table 2** The first four eigenvectors describing >80% of total genetic variation for each G-matrix estimated at each elevation for:  
 295 (a) *S. aethnensis*, and (b) *S. chrysanthemifolius*. HPD represents the upper and lower 95% Highest Posterior Density intervals.  
 296 ‘Proportion’ quantifies the proportion of total genetic variance that each eigenvector describes, and ‘Cumulative’ represents the  
 297 cumulative proportion of genetic variance. Trait loadings in bold are greater than 0.2 to aid interpretation of the eigenvectors.

|                                         | 500m         |              |              |              | 1,000m       |              |              |              | 1,500m       |              |              |              | 2,000m       |              |              |              |
|-----------------------------------------|--------------|--------------|--------------|--------------|--------------|--------------|--------------|--------------|--------------|--------------|--------------|--------------|--------------|--------------|--------------|--------------|
|                                         | $g_{\max}$   | $g_2$        | $g_3$        | $g_4$        | $g_{\max}$   | $g_2$        | $g_3$        | $g_4$        | $g_{\max}$   | $g_2$        | $g_3$        | $g_4$        | $g_{\max}$   | $g_2$        | $g_3$        | $g_4$        |
| <b>(a) <i>S. aethnensis</i></b>         |              |              |              |              |              |              |              |              |              |              |              |              |              |              |              |              |
| <b>Eigenvalues</b>                      | 0.046        | 0.031        | 0.020        | 0.007        | 0.049        | 0.020        | 0.011        | 0.008        | 0.050        | 0.026        | 0.014        | 0.008        | 0.019        | 0.014        | 0.009        | 0.007        |
| <b>HPDlwr</b>                           | 0.020        | 0.011        | 0.008        | 0.001        | 0.022        | 0.008        | 0.003        | 0.001        | 0.019        | 0.002        | 0.005        | 0.001        | 0.002        | 0.004        | 0.003        | 0.001        |
| <b>HPDupp</b>                           | 0.076        | 0.053        | 0.034        | 0.017        | 0.080        | 0.034        | 0.022        | 0.018        | 0.084        | 0.064        | 0.025        | 0.021        | 0.038        | 0.026        | 0.017        | 0.020        |
| <b>Proportion</b>                       | 0.41         | 0.27         | 0.18         | 0.06         | 0.51         | 0.20         | 0.12         | 0.08         | 0.45         | 0.23         | 0.12         | 0.07         | 0.30         | 0.22         | 0.15         | 0.12         |
| <b>Cumulative</b>                       | 0.41         | 0.68         | 0.86         | 0.92         | 0.51         | 0.71         | 0.83         | 0.91         | 0.45         | 0.68         | 0.80         | 0.87         | 0.30         | 0.52         | 0.67         | 0.79         |
| <b>Traits:</b>                          |              |              |              |              |              |              |              |              |              |              |              |              |              |              |              |              |
| Area                                    | 0.19         | <b>0.33</b>  | 0.04         | -0.12        | 0.17         | <b>0.45</b>  | <b>0.67</b>  | <b>-0.54</b> | <b>0.20</b>  | <b>0.86</b>  | <b>-0.44</b> | 0.16         | <b>0.21</b>  | <b>0.29</b>  | <b>0.26</b>  | <b>0.87</b>  |
| P2A                                     | 0.12         | <b>-0.41</b> | <b>0.88</b>  | 0.07         | <b>0.30</b>  | <b>-0.83</b> | <b>0.44</b>  | -0.08        | <b>0.34</b>  | <b>-0.52</b> | <b>-0.70</b> | <b>0.32</b>  | <b>-0.47</b> | <b>-0.71</b> | <b>0.22</b>  | <b>0.30</b>  |
| Nind                                    | <b>-0.51</b> | <b>-0.39</b> | -0.04        | <b>-0.33</b> | <b>-0.26</b> | <b>-0.22</b> | <b>-0.29</b> | <b>-0.58</b> | <b>-0.59</b> | 0.02         | <b>-0.25</b> | -0.05        | <b>-0.30</b> | 0.01         | -0.06        | -0.10        |
| IW                                      | <b>0.47</b>  | <b>0.28</b>  | 0.17         | <b>0.27</b>  | <b>0.24</b>  | 0.18         | <b>0.25</b>  | <b>0.55</b>  | <b>0.64</b>  | 0.03         | <b>0.33</b>  | -0.01        | 0.17         | -0.08        | 0.01         | 0.13         |
| SLA                                     | 0.04         | <b>-0.23</b> | <b>-0.23</b> | <b>0.63</b>  | 0.17         | 0.15         | -0.16        | <b>-0.20</b> | -0.03        | -0.03        | -0.16        | <b>-0.53</b> | -0.07        | <b>0.20</b>  | <b>-0.76</b> | <b>0.20</b>  |
| Chl                                     | 0.00         | <b>0.34</b>  | <b>0.20</b>  | <b>-0.33</b> | -0.13        | -0.08        | 0.06         | 0.11         | 0.10         | 0.00         | <b>0.24</b>  | 0.13         | <b>0.48</b>  | -0.13        | 0.16         | -0.14        |
| Flav                                    | <b>-0.69</b> | <b>0.50</b>  | <b>0.29</b>  | <b>0.43</b>  | <b>-0.83</b> | -0.04        | <b>0.42</b>  | 0.13         | <b>-0.26</b> | 0.02         | <b>0.24</b>  | <b>0.75</b>  | 0.08         | <b>0.27</b>  | <b>0.46</b>  | <b>-0.27</b> |
| Anth                                    | -0.03        | <b>-0.27</b> | -0.08        | <b>0.34</b>  | 0.15         | 0.06         | 0.06         | -0.07        | -0.05        | -0.01        | -0.04        | 0.06         | <b>-0.61</b> | <b>0.53</b>  | <b>0.23</b>  | -0.01        |
| <b>(b) <i>S. chrysanthemifolius</i></b> |              |              |              |              |              |              |              |              |              |              |              |              |              |              |              |              |
| <b>Eigenvalues</b>                      | 0.053        | 0.027        | 0.016        | 0.012        | 0.048        | 0.023        | 0.010        | 0.004        | 0.022        | 0.015        | 0.013        | 0.010        | 0.028        | 0.009        | 0.005        | 0.004        |
| <b>HPDlwr</b>                           | 0.024        | 0.012        | 0.007        | 0.004        | 0.020        | 0.011        | 0.001        | 0.001        | 0.005        | 0.001        | 0.002        | 0.001        | 0.003        | 0.000        | 0.000        | 0.000        |
| <b>HPDupp</b>                           | 0.087        | 0.044        | 0.028        | 0.022        | 0.083        | 0.039        | 0.023        | 0.008        | 0.041        | 0.035        | 0.028        | 0.025        | 0.058        | 0.022        | 0.013        | 0.013        |
| <b>Proportion</b>                       | 0.45         | 0.23         | 0.14         | 0.11         | 0.52         | 0.25         | 0.10         | 0.04         | 0.29         | 0.20         | 0.17         | 0.14         | 0.52         | 0.16         | 0.09         | 0.08         |
| <b>Cumulative</b>                       | 0.45         | 0.68         | 0.82         | 0.93         | 0.52         | 0.77         | 0.87         | 0.91         | 0.29         | 0.49         | 0.66         | 0.80         | 0.52         | 0.68         | 0.77         | 0.85         |
| <b>Traits:</b>                          |              |              |              |              |              |              |              |              |              |              |              |              |              |              |              |              |
| Area                                    | <b>-0.21</b> | <b>0.74</b>  | <b>-0.22</b> | <b>0.57</b>  | <b>0.25</b>  | -0.07        | <b>0.92</b>  | <b>0.21</b>  | <b>0.43</b>  | <b>0.53</b>  | -0.05        | <b>0.67</b>  | -0.03        | <b>-0.52</b> | <b>0.74</b>  | <b>-0.38</b> |
| P2A                                     | <b>-0.91</b> | <b>-0.35</b> | 0.07         | 0.16         | <b>-0.92</b> | 0.02         | <b>0.31</b>  | <b>-0.23</b> | <b>-0.47</b> | <b>0.64</b>  | <b>-0.52</b> | <b>-0.20</b> | <b>-0.97</b> | 0.07         | 0.00         | -0.05        |
| Nind                                    | 0.10         | <b>-0.30</b> | <b>-0.45</b> | 0.11         | 0.02         | <b>0.65</b>  | 0.04         | <b>0.22</b>  | <b>0.55</b>  | 0.11         | 0.01         | <b>-0.38</b> | 0.18         | <b>0.58</b>  | <b>0.38</b>  | -0.03        |
| IW                                      | -0.05        | <b>0.32</b>  | <b>0.65</b>  | -0.18        | 0.07         | <b>-0.68</b> | -0.02        | -0.07        | <b>-0.41</b> | <b>-0.30</b> | -0.03        | <b>0.35</b>  | 0.05         | <b>-0.53</b> | <b>-0.34</b> | 0.09         |
| SLA                                     | 0.03         | 0.11         | <b>-0.46</b> | -0.07        | 0.03         | -0.01        | -0.02        | 0.01         | 0.04         | <b>0.20</b>  | 0.08         | -0.15        | -0.01        | 0.13         | <b>0.23</b>  | -0.03        |
| Chl                                     | 0.01         | 0.07         | 0.01         | -0.16        | 0.08         | 0.13         | 0.08         | 0.11         | <b>0.32</b>  | <b>-0.32</b> | <b>-0.73</b> | -0.17        | 0.09         | -0.12        | -0.17        | <b>-0.27</b> |
| Flav                                    | <b>0.34</b>  | <b>-0.35</b> | <b>0.32</b>  | <b>0.73</b>  | <b>0.29</b>  | <b>0.23</b>  | 0.14         | <b>-0.91</b> | 0.13         | 0.04         | 0.14         | 0.06         | 0.10         | <b>-0.22</b> | 0.07         | 0.09         |
| Anth                                    | -0.01        | 0.02         | 0.11         | 0.18         | 0.04         | <b>-0.21</b> | 0.15         | -0.13        | -0.07        | <b>0.24</b>  | <b>0.41</b>  | <b>-0.43</b> | -0.05        | -0.16        | <b>0.32</b>  | <b>0.87</b>  |

298

299

300 The first axis of **G**,  $g_{\max}$ , describes the greatest amount of genetic variance. It is expected that  $g_{\max}$  will  
 301 remain stable due to pleiotropy preventing independent changes in different traits. However, for *S. aethnensis*  
 302 we found that all elevations were nearly orthogonal to the home site (angle between  $g_{\max}$  at the home site

303 [2,000m] and  $g_{\max}$  at: 1,500m=76.2°; 1,000m=77.8°; 500m=79.7°). By comparison, for *S. chrysanthemifolius*  
 304 the angle between the home site (500m) and the other elevations were much lower (1,000m=28.3°;  
 305 1,500m=62.2°; 2,000m=20.1°).

306 **G changes more across elevation than between species:** To quantify differences in **G** we used a covariance  
 307 tensor approach, which we applied to two separate analyses. To test whether species or elevation created  
 308 larger changes in **G**, we applied a covariance tensor to the G-matrices of both species at the elevational  
 309 extremes (both native elevations). Elevational differences in **G** appear to be substantial for both species (**Fig.**  
 310 **3a, Table2** and **Fig. S5**). Using the covariance tensor to quantify differences in genetic variance, we found  
 311 that two (of three) eigentensors described greater differences in genetic variance compared to the null  
 312 expectation (**Fig. S3a**). The coordinates capture how each matrix contributes to the differences described by  
 313 an eigentensor. The first eigentensor, which captures 31.9% of all differences among G-matrices, describes  
 314 large differences between extreme elevations, but not between species (**Fig. 3b**). By contrast, the second  
 315 eigentensor captures 26.2% of all differences among G-matrices, and describes large differences between  
 316 species, but not between elevations (**Fig. 3b**). Therefore, elevation created larger changes in **G** than adaptive  
 317 divergence between the two species.

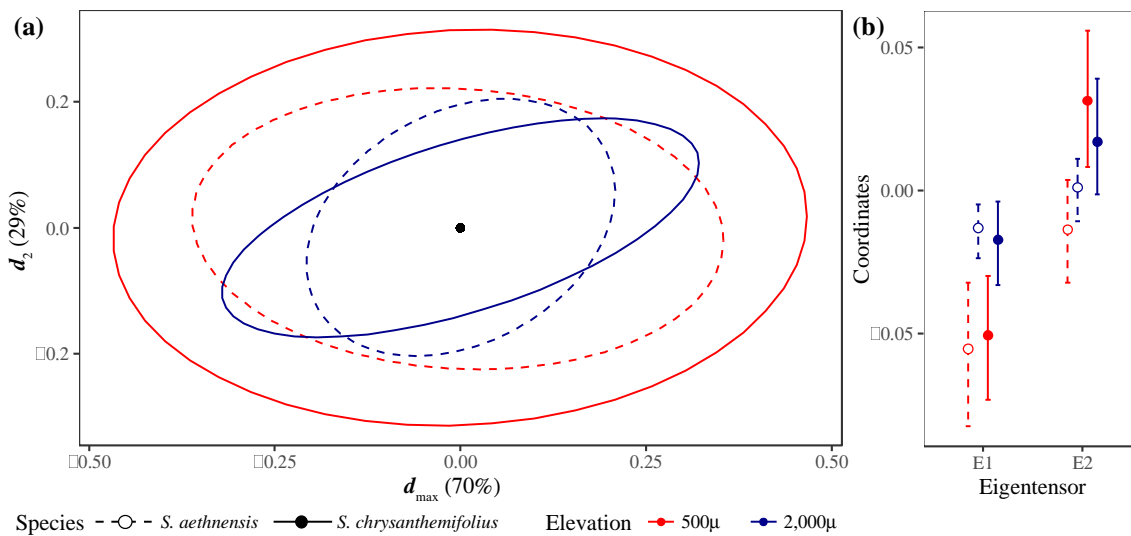

318 Species - -○- *S. aethnensis* -●- *S. chrysanthemifolius* Elevation -●- 500μ -●- 2,000μ  
 319 **Fig. 3** Differences in **G** are greater across elevational extremes than between species. **(a)** Visualising differences between species at  
 320 the elevational extremes shows that the two species differ in their G-matrices, and that they respond to elevation differently. **(b)**  
 321 The coordinates quantify how each matrix contributes to differences in genetic variance described by each eigentensor. Credible  
 322 intervals represent the 95% HPD (Highest Posterior Density) intervals. The first eigentensor (describing 31.9% of the total  
 323 difference in genetic variance) describes differences between the elevational extremes, but not differences between species. By  
 324 contrast, the second eigentensor (describing 26.2% of the total difference in genetic variance) describes differences between  
 325 species, but not between elevations. The summary of the tensor is located in **Table S3a**.

326

327 Second, we used the covariance tensor approach to quantify changes in  $\mathbf{G}$  across elevation for each species  
 328 separately. Visualising the G-matrices of the two species suggests large changes across elevation (**Fig. 4a**).  
 329 We found that two eigentensors for *S. aethnensis*, and one eigentensor for *S. chrysanthemifolius* capture  
 330 greater differences in genetic variance than expected under random sampling (**Fig. S3b-c**). For *S. aethnensis*,  
 331 the coordinates of the first eigentensor reveal strong differences in  $\mathbf{G}$  between 2,000m and the lower  
 332 elevations, while the second eigentensor quantifies differences between the two upper and lower elevations  
 333 (**Fig. 4b**). Similarly, the first eigentensor captures differences between the upper and lower elevations for *S.*  
 334 *chrysanthemifolius* (**Fig. 4b**). Projecting the eigenvectors of eigentensors through the original G-matrices  
 335 reveals how each original matrix (i.e. each elevation) contributes to the differences in genetic variance  
 336 described by that particular eigenvector. We present only the first four eigenvectors from each eigentensor  
 337 because these describe >80% of the differences captured by each eigentensor. Eigenvectors of eigentensors  
 338 describe significant differences in genetic variance across elevation (**Fig. 4c**).

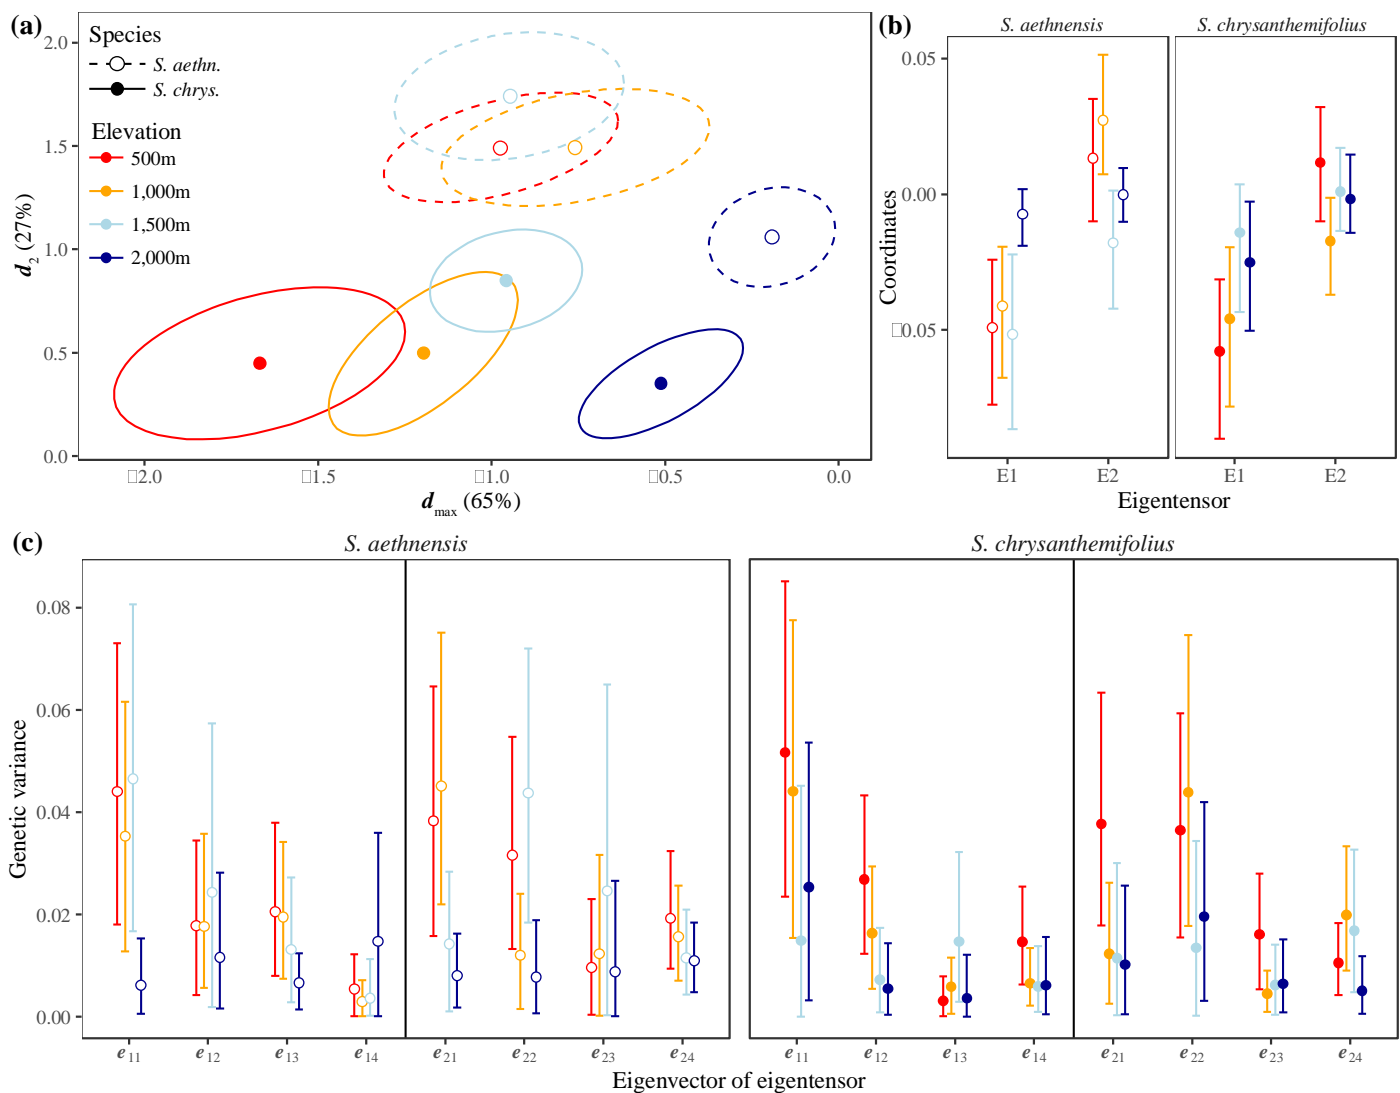

339

340 **Fig. 4** Elevation induces changes in  $\mathbf{G}$  for both species. **(a)** Visualising G-matrices for both species at all elevations shows how



341 they change with the change in mean phenotype. **(b)** The coordinates show that, for both species, the first two eigentensors  
 342 describe elevational differences in genetic variance. Credible intervals represent the 95% HPD intervals. **(c)** To identify how each  
 343 elevation contributes to differences in **G** captured by the eigenvectors of eigentensors, we use matrix projection. **G**-matrices that  
 344 describe more variance for a given eigenvector (of an eigentensor) contribute to the differences in elevation described by that  
 345 particular eigenvector of the eigentensor. We only present the first four eigenvectors because they describe >80% of the difference  
 346 in genetic variance captured by each eigentensor. The tensor summaries are located in **Table S3b-c**.

347

### 348 3. Changes in genetic variance are associated with changes in mean phenotype

349 If **G**×**E** interactions that change **G** are associated with plasticity, we predicted that elevational differences in  
 350 **G** would align with plastic changes in mean phenotype. To test this (for each species separately), we  
 351 projected the eigenvectors of eigentensors (from **Fig. 4c**), which capture the greatest differences in **G**,  
 352 through the **D**-matrix (representing elevational differences in mean multivariate phenotype). If changes in **G**  
 353 were associated with plasticity, then eigenvectors of eigentensors that describe the greatest differences in **G**  
 354 (i.e. the leading eigenvectors of each eigentensor) would also describe more variance in **D** than expected  
 355 under random sampling. We found that for both species, our results supported our predictions, and that this  
 356 was particularly strong for *S. chrysanthemifolius* (**Fig. 5**).

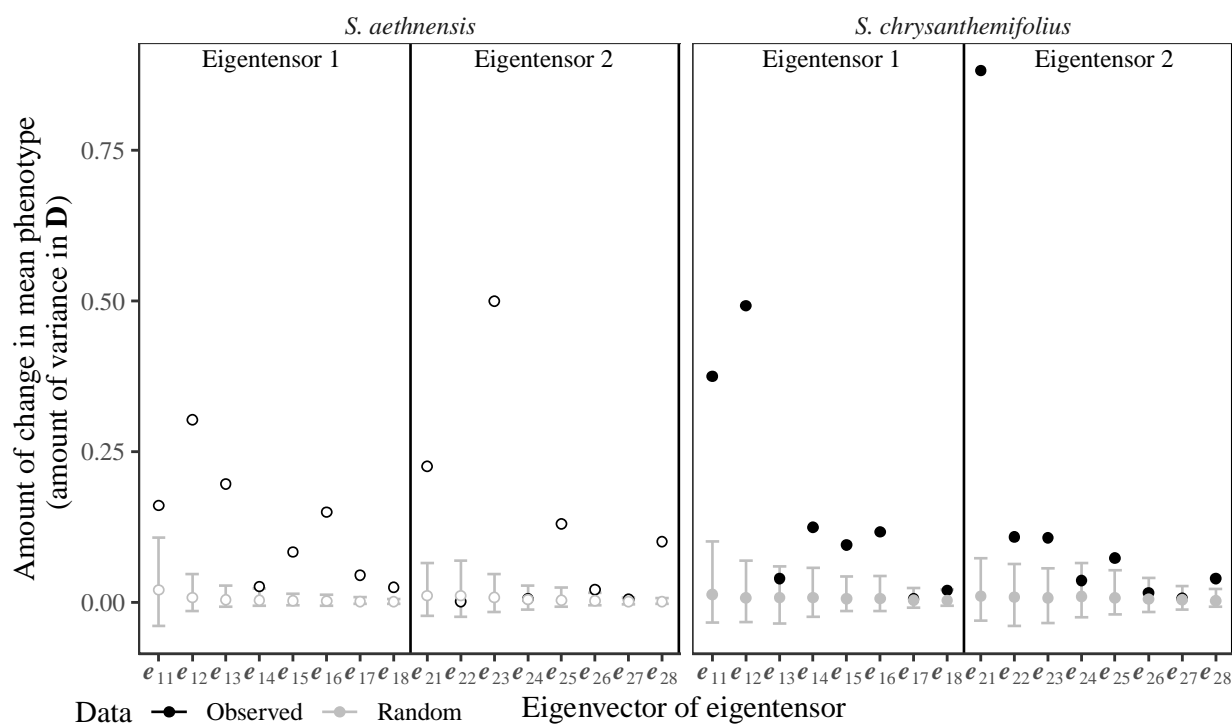

357

358 **Fig. 5** Eigenvectors of eigentensors that describe large differences in **G** also describe large changes in mean multivariate  
 359 phenotype. The first two eigenvectors of each eigentensor capture >90% of the difference in genetic variance described by that  
 360 eigentensor. We predicted that if the first two eigenvectors (that capture the greatest difference in genetic variance) describe large  
 361 differences in mean multivariate phenotype, then changes in **G** align with plasticity. Projecting the eigenvectors of eigentensors

362 through the observed D-matrix (black circles) shows that the leading eigenvectors from each eigentensor describe greater  
363 differences in mean phenotype than expected under random sampling (gray circles and credible intervals representing 95% HPD  
364 intervals) and describe the greatest difference in mean phenotype. Therefore, we found evidence that changes in  $\mathbf{G}$  align with  
365 plastic changes in mean phenotype.

366

367 Changes in  $\mathbf{G}$  are associated with  $G \times E$  in plasticity: Estimating the G-matrix for the axis representing the  
368 largest change in mean phenotype ( $d_{\max}$ ), quantifies the genetic variance at each elevation and the genetic  
369 covariance between elevations. We found evidence of  $G \times E$  as large changes in genetic variance across  
370 elevation, with much smaller amounts of genetic variance at high elevation for both species (**Fig. 6; Table**  
371 **S4**). Genetic correlations between elevations are moderately strong and range from 0.42 to 0.72 (**Table S4**).  
372 Genetic correlations between elevations of less than one suggest that  $G \times E$  is also present as a change in sire  
373 rank across elevation (**Fig. 6**).

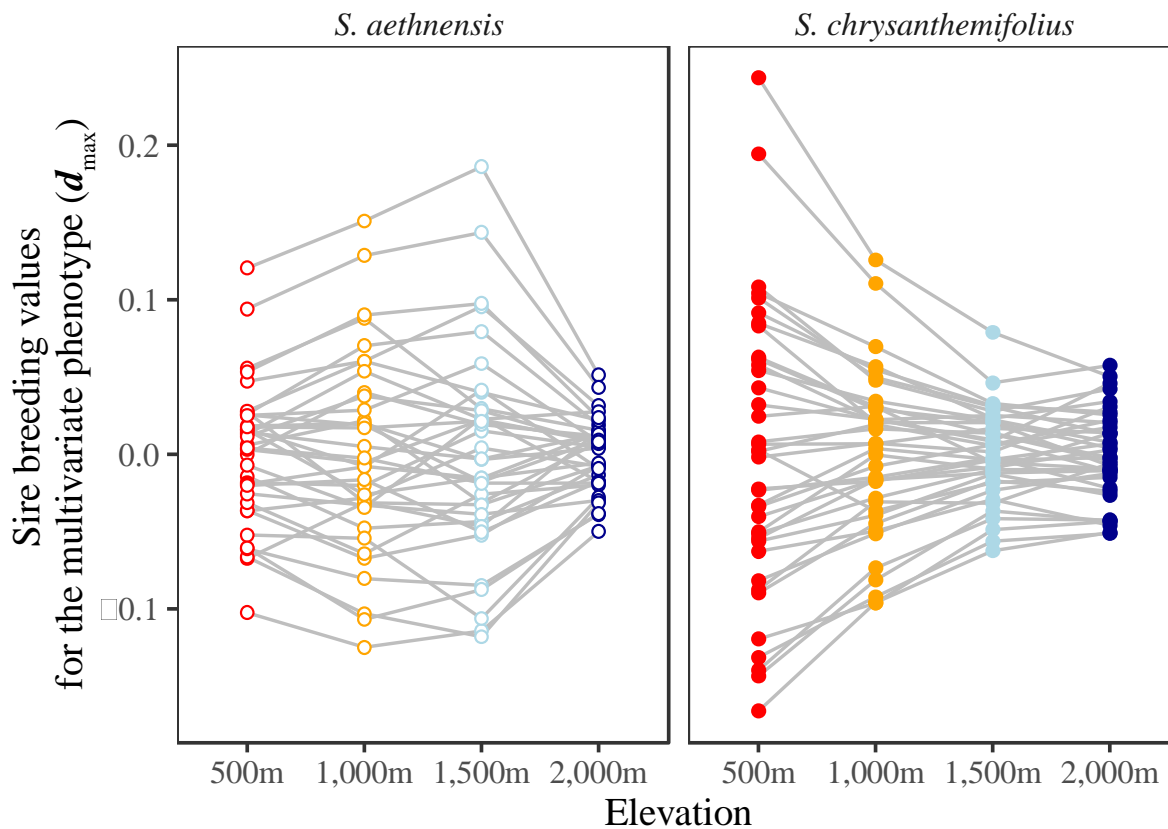

374

375 **Fig. 6** Sire breeding values for each species at each elevation show how sires change in genetic value relative to each other.

376 Plasticity (as changes in mean phenotype captured by  $d_{\max}$  from **Fig. 2**) is associated with  $G \times E$  as a large change in genetic  
377 variance across elevation, as well as changes in sire rank across elevation (crossing of sires between elevations).

378

## 379 Discussion

380 We planted seeds from a breeding design of two closely related but ecologically distinct species across an  
381 environmental (elevation) gradient that included each species' native environment and two intermediate  
382 environments. We found that estimates of plasticity for eight leaf traits suggested that the phenotype of *S.*  
383 *chrysanthemifolius* moved towards the phenotype of *S. aethnensis* at high elevations, while the phenotype of  
384 *S. aethnensis* moved further away from the phenotype of *S. chrysanthemifolius* at lower elevations (**Fig. 2**).  
385 This suggests that *S. chrysanthemifolius* shows a more appropriate phenotypic response to a novel  
386 environment. Changes in genetic variance across elevation were both significant and stronger than  
387 differences between species (**Fig. 3**), and were consistent across elevation for both species (**Fig. 4**).  
388 Elevational differences in genetic variance aligned with plasticity as the change in mean phenotype (**Fig. 5**),  
389 and were created by patterns of G×E as elevational changes in genetic variance and sire rank (**Fig. 6**).  
390 Together, these results suggest that changes in genetic variance occur as a result of G×E underlying  
391 phenotypic plasticity in novel environments, which will likely determine the potential for adaptation in novel  
392 environments.

393 By analysing published studies, Wood and Brodie III (2015) found evidence that **G** is likely affected by the  
394 environment as much as by evolution, but their results as to why **G** changed in response to the environment  
395 were inconclusive. We help to resolve this by showing that novel environments not only create larger  
396 changes in **G** than evolutionary history, but that such changes in **G** occur in the direction of plasticity as a  
397 consequence of G×E interactions. Our findings not only support an alignment between plasticity and genetic  
398 variation (Noble et al. 2019; Johansson et al. 2020), but suggest that to predict evolutionary responses to  
399 environmental change, we need to better understand how genetic variation responds to environmental  
400 variation. Therefore, future work needs to consider G×E to understand when and how constraints to  
401 adaptation will prevent evolutionary rescue in novel environments, and to identify whether environment-  
402 dependent genetic constraints could determine evolutionary trajectories.

403 Our results show that in order to better understand the potential for evolutionary rescue it will be necessary to  
404 quantify the prevalence of G×E across a species' range and understand the potential for G×E to maintain  
405 ecological resilience in novel environments. Evolutionary rescue will be possible if sufficient G×E in  
406 plasticity is available, and selection on genetic variation in plasticity increases fitness in novel environments  
407 (Chevin et al. 2010; Chevin and Hoffmann 2017), which can then lead to genetic assimilation of an initially  
408 plastic response (Waddington 1953; Lande 2009). Although selection on plasticity should result in rapid  
409 adaptation that facilitates evolutionary rescue (Charmantier et al. 2008; Wang and Althoff 2019; Walter et al.  
410 2020), we still do not know whether environmental change will be too extreme or rapid to allow evolutionary

411 rescue. Furthermore, it is likely that in response to novel environments, not only will selection be for the  
412 appropriate phenotype (i.e. change in mean phenotype), it is likely that selection for new forms of plasticity  
413 that are appropriate to the novel environment (i.e. appropriate fluctuations around the new mean phenotype)  
414 will need to evolve. Given the unpredictable nature of novel environments however, selection for a new form  
415 of plasticity might be difficult (Leung et al. 2020).

416 The initial resilience of populations exposed to a novel environment will likely depend on how close  
417 plasticity is able to move the population towards a phenotypic optimum. Evidence suggests that plasticity in  
418 novel environments is more often maladaptive (Langerhans and DeWitt 2002; Palacio-López et al. 2015;  
419 Acasuso-Rivero et al. 2019), which means that populations will likely need to rely on rapid adaptation to  
420 maintain fitness and prevent extinction. However, there are two major obstacles for evolutionary rescue.  
421 Firstly, the adaptive potential for novel environments will be greatly diminished if genetic variance in the  
422 direction of selection is low (Walsh and Blows 2009), which can occur if G×E reduces genetic variance in  
423 novel environments. We found that the availability of genetic variance for evolutionary rescue will be  
424 species-specific. *Senecio aethnensis* showed an increase in genetic variance in the novel environment  
425 (500m), which contrasted with *S. chrysanthemifolius*, which showed a decrease in genetic variance at 2,000m  
426 (**Table 2**). These results therefore suggest that despite high elevation species having lowered plasticity  
427 compared to lower elevation species (Gugger et al. 2015; Schmid et al. 2017; de Villemereuil et al. 2018),  
428 selection on increased genetic variation in response to low-elevation (i.e. warmer) conditions could allow  
429 evolutionary rescue.

430 Secondly, the potential for rapid adaptation to a novel environment will be determined by the amount of  
431 genetic versus phenotypic variance underlying the multivariate phenotype. If plasticity common to all  
432 genotypes creates phenotypic variance that hides beneficial genetic variation from selection, then a  
433 demographic barrier to adaptation will arise because too few individuals will contribute to the following  
434 generation and the populations is more likely to go extinct (Chevin et al. 2013). In other words, if phenotypic  
435 variance is biased towards a direction in multivariate phenotype that is different to genetic variance, then it  
436 will make adaptation difficult because even if there is substantial genetic variation in the direction of  
437 selection, only a small fraction of the population would possess the beneficial alleles and adaptation will be  
438 difficult. Comparing genetic and phenotypic variance with the direction of selection using quantitative  
439 genetics in reciprocal transplant experiments can therefore identify whether evolutionary rescue in novel  
440 environments will be sufficiently rapid to avoid extinction. Such experiments can also be used to predict  
441 evolutionary trajectories during adaptation to novel environments by identifying whether evolutionary rescue  
442 favours adaptation towards the phenotype of species native to the novel environment, or whether adaptation

443 favours a different phenotypic optimum.

444 Although we show that G×E can shift the G-matrix in response to novel environments, whether such shifts  
445 can help to promote evolutionary rescue requires estimates of selection and cross-generational selection  
446 experiments. A bottleneck event that occurs during the colonisation of (or exposure to) novel environments  
447 reduces population size, which can create instability in **G** (Arnold et al. 2008). Evolutionary rescue can only  
448 occur in small populations if adaptive alleles increase in frequency rapidly enough to allow adaptation before  
449 extinction occurs. Small population sizes can have important consequences for genetic variation by making  
450 **G** unstable (Jones et al. 2003). Rapid changes to the orientation and size of **G** can occur when rare alleles  
451 held at mutation-selection balance readily increase in frequency (Jones et al. 2003). If such alleles underlie  
452 G×E interactions that have low benefit in the native environments, but increase fitness in novel environments  
453 (Walter et al. 2020), then the G×E effects of new mutations (Roles et al. 2016) or rare/hidden variants  
454 (Schlichting 2008; Brennan et al. 2019) could facilitate evolutionary rescue. It is then likely that mutation  
455 will determine whether genetic constraints to rapid adaptation can be overcome for small populations. If  
456 pleiotropic mutations that provide beneficial genetic variation in the direction of selection arise readily, then  
457 the orientation of **G** can change rapidly for small populations, reducing the constraints to adaptation and  
458 making evolutionary rescue more likely (Arnold et al. 2008). Future studies should therefore determine the  
459 effect of mutation accumulation on G×E and the response of **G** to novel environments.

460

461 **Acknowledgements:** We are very grateful to Pianta Faro (Giarre, Italy) for providing us with glasshouse  
462 facilities. We thank Mauro Calvagna for his assistance with the fieldwork, and Giuseppe Riggio for  
463 generously providing us access to the 1,000m field site. This work was carried out using the computational  
464 facilities of the Advanced Computing Research Centre, University of Bristol. **Funding:** This work was  
465 supported by joint NERC grants NE/P001793/1 and NE/P002145/1 awarded to JB and SH. **Data**  
466 **availability:** Upon acceptance, data will be deposited with the Environmental Information Data Centre (UK).

467

## 468 **References**

- 469 Acasuso-Rivero, C., C. J. Murren, C. D. Schlichting, and U. K. Steiner. 2019. Adaptive phenotypic plasticity  
470 for life-history and less fitness-related traits. *Proceedings of the Royal Society B-Biological Sciences*  
471 286.
- 472 Aguirre, J. D., E. Hine, K. McGuigan, and M. W. Blows. 2014. Comparing G: multivariate analysis of  
473 genetic variation in multiple populations. *Heredity* 112:21-29.

- 474 Arnold, S. J. 1992. Constraints on Phenotypic Evolution. *The American Naturalist* 140:S85-S107.
- 475 Arnold, S. J., R. Burger, P. A. Hohenlohe, B. C. Ajie, and A. G. Jones. 2008. Understanding the Evolution  
476 and Stability of the G-Matrix. *Evolution* 62:2451-2461.
- 477 Bassler, P. J., and S. Pajevic. 2007. Spectral decomposition of a 4th-order covariance tensor: Applications to  
478 diffusion tensor MRI. *Signal Processing* 87:220-236.
- 479 Bell, G., and A. Gonzalez. 2009. Evolutionary rescue can prevent extinction following environmental  
480 change. *Ecology Letters* 12:942-948.
- 481 Brennan, R. S., A. D. Garrett, K. E. Huber, H. Hargarten, and M. H. Pespeni. 2019. Rare genetic variation  
482 and balanced polymorphisms are important for survival in global change conditions. *Proceedings of  
483 the Royal Society B-Biological Sciences* 286:20190943.
- 484 Bylesjo, M., V. Segura, R. Y. Soolanayakanahally, A. M. Rae, J. Trygg, P. Gustafsson, S. Jansson et al.  
485 2008. LAMINA: a tool for rapid quantification of leaf size and shape parameters. *BMC Plant Biology*  
486 8.
- 487 Charmantier, A., R. H. McCleery, L. R. Cole, C. Perrins, L. E. B. Kruuk, and B. C. Sheldon. 2008. Adaptive  
488 phenotypic plasticity in response to climate change in a wild bird population. *Science* 320:800-803.
- 489 Chenoweth, S. F., H. D. Rundle, and M. W. Blows. 2010. The contribution of selection and genetic  
490 constraints to phenotypic divergence. *The American Naturalist* 175:186-196.
- 491 Cheverud, J. M. 1984. Quantitative Genetics and Developmental Constraints on Evolution by Selection.  
492 *Journal of Theoretical Biology* 110:155-171.
- 493 Chevin, L. M., S. Collins, and F. Lefèvre. 2013. Phenotypic plasticity and evolutionary demographic  
494 responses to climate change: taking theory out to the field. *Functional Ecology* 27:966-979.
- 495 Chevin, L. M., and A. A. Hoffmann. 2017. Evolution of phenotypic plasticity in extreme environments.  
496 *Philosophical Transactions of the Royal Society of London Series B-Biological Sciences*  
497 372:20160138.
- 498 Chevin, L. M., R. Lande, and G. M. Mace. 2010. Adaptation, plasticity, and extinction in a changing  
499 environment: towards a predictive theory. *PLoS Biology* 8:e1000357.
- 500 de Villemereuil, P., M. Mouterde, O. E. Gaggiotti, and I. Till-Bottraud. 2018. Patterns of phenotypic  
501 plasticity and local adaptation in the wide elevation range of the alpine plant *Arabis alpina*. *Journal of  
502 Ecology* 106:1952-1971.
- 503 Doroszuk, A., M. W. Wojewodzic, G. Gort, and J. E. Kammenga. 2008. Rapid divergence of genetic  
504 variance-covariance matrix within a natural population. *The American Naturalist* 171:291-304.
- 505 Eroukhmanoff, F., and E. I. Svensson. 2011. Evolution and stability of the G-matrix during the colonization  
506 of a novel environment. *Journal of Evolutionary Biology* 24:1363-1373.
- 507 Ghalambor, C. K., J. K. McKay, S. P. Carroll, and D. N. Reznick. 2007. Adaptive versus non-adaptive  
508 phenotypic plasticity and the potential for contemporary adaptation in new environments. *Functional  
509 Ecology* 21:394-407.

- 510 Gomulkiewicz, R., and R. D. Holt. 1995. When does evolution by natural selection prevent extinction?  
511 *Evolution* 49:201-207.
- 512 Gugger, S., H. Kesselring, J. Stöcklin, and E. Hamann. 2015. Lower plasticity exhibited by high- versus mid-  
513 elevation species in their phenological responses to manipulated temperature and drought. *Annals of*  
514 *Botany* 116:953-962.
- 515 Hadfield, J. D. 2010. MCMC Methods for multi-response generalized linear mixed models: The  
516 MCMCglmm R package. *Journal of Statistical Software* 33:1-22.
- 517 Hansen, T. F., and D. Houle. 2008. Measuring and comparing evolvability and constraint in multivariate  
518 characters. *Journal of Evolutionary Biology* 21:1201-1219.
- 519 Hine, E., S. F. Chenoweth, H. D. Rundle, and M. W. Blows. 2009. Characterizing the evolution of genetic  
520 variance using genetic covariance tensors. *Philosophical Transactions of the Royal Society of London*  
521 *Series B-Biological Sciences* 364:1567-1578.
- 522 Johansson, F., P. C. Watts, S. Sniegula, and D. Berger. 2020. Natural selection mediated by seasonal time  
523 constraints increases the alignment between evolvability and developmental plasticity. *Evolution*.
- 524 Jones, A. G., S. J. Arnold, and R. Bürger. 2003. Stability of the G-matrix in a population experiencing  
525 pleiotropic mutation, stabilizing selection, and genetic drift. *Evolution* 57:1747-1760.
- 526 Lande, R. 1979. Quantitative genetic analysis of multivariate evolution, applied to brain:body size allometry.  
527 *Evolution* 33:402-416.
- 528 —. 1980. The Genetic Covariance between Characters Maintained by Pleiotropic Mutations. *Genetics*  
529 94:203-215.
- 530 —. 2009. Adaptation to an extraordinary environment by evolution of phenotypic plasticity and genetic  
531 assimilation. *Journal of Evolutionary Biology* 22:1435-1446.
- 532 Langerhans, R. B., and T. J. DeWitt. 2002. Plasticity constrained: over-generalized induction cues cause  
533 maladaptive phenotypes. *Evolutionary Ecology Research* 4:857-870.
- 534 Leung, C., M. Rescan, D. Grulois, and L. M. Chevin. 2020. Reduced phenotypic plasticity evolves in less  
535 predictable environments. *Ecology Letters* 23:1664-1672.
- 536 Lynch, M., and B. Walsh. 1998, *Genetics and analysis of quantitative traits*. Sunderland, Sinauer Associates,  
537 Inc.
- 538 Martin, G., E. Chapuis, and J. Goudet. 2008. Multivariate  $Q_{st}$ - $F_{st}$  Comparisons: A Neutrality Test for the  
539 Evolution of the G Matrix in Structured Populations. *Genetics* 180:2135-2149.
- 540 McGlothlin, J. W., M. E. Kobiela, H. V. Wright, D. L. Mahler, J. J. Kolbe, J. B. Losos, and E. D. Brodie, III.  
541 2018. Adaptive radiation along a deeply conserved genetic line of least resistance in *Anolis* lizards.  
542 *Evolution Letters* 2:310-322.
- 543 Morrissey, M. B., S. Hangartner, and K. Monro. 2019. A note on simulating null distributions for **G** matrix  
544 comparisons. *Evolution* 73:2512-2517.
- 545 Noble, D. W. A., R. Radersma, and T. Uller. 2019. Plastic responses to novel environments are biased

- 546 towards phenotype dimensions with high additive genetic variation. Proceedings of the National  
547 Academy of Sciences, USA 116:13452-13461.
- 548 Palacio-López, K., B. Beckage, S. Scheiner, and J. Molofsky. 2015. The ubiquity of phenotypic plasticity in  
549 plants: a synthesis. Ecology and Evolution 5:3389-3400.
- 550 R Core Team. 2019 R: A language and environment for statistical computing, version 3.6.1. R Foundation  
551 for Statistical Computing, Vienna, Austria.
- 552 Roles, A. J., M. T. Rutter, I. Dworkin, C. B. Fenster, and J. K. Conner. 2016. Field measurements of  
553 genotype by environment interaction for fitness caused by spontaneous mutations in *Arabidopsis*  
554 *thaliana*. Evolution 70:1039-1050.
- 555 Schlichting, C. D. 2008. Hidden reaction norms, cryptic genetic variation, and evolvability. Annals of the  
556 New York Academy of Sciences 1133:187–203.
- 557 Schmid, S. F., J. Stocklin, E. Hamann, and H. Kesselring. 2017. High-elevation plants have reduced  
558 plasticity in flowering time in response to warming compared to low-elevation congeners. Basic and  
559 Applied Ecology 21:1-12.
- 560 Via, S., R. Gomulkiewicz, G. De Jong, S. M. Scheiner, C. D. Schlichting, and P. H. Van Tienderen. 1995.  
561 Adaptive phenotypic plasticity: consensus and controversy. Trends in Ecology & Evolution 10:212-  
562 217.
- 563 Waddington, C. H. 1953. Genetic Assimilation of an Acquired Character. Evolution 7:118-126.
- 564 Walsh, B., and M. W. Blows. 2009. Abundant Genetic Variation plus Strong Selection = Multivariate  
565 Genetic Constraints: A Geometric View of Adaptation. Annual Review of Ecology, Evolution, and  
566 Systematics 40:41-59.
- 567 Walter, G. M., J. D. Aguirre, M. W. Blows, and D. Ortiz-Barrientos. 2018. Evolution of genetic variance  
568 during adaptive radiation. The American Naturalist 191:E108–E128.
- 569 Walter, G. M., J. Clark, D. Terranova, S. Cozzolino, A. Cristaudo, S. J. Hiscock, and J. R. Bridle. 2020.  
570 Hidden genetic variation in plasticity increases the potential to adapt to novel environments. bioRxiv  
571 doi: <https://doi.org/10.1101/2020.10.26.356451>
- 572 Walter, G. M., S. du Plessis, D. Terranova, E. la Spina, M. G. Majorana, G. Pepe, J. Clark et al. 2021.  
573 Adaptive maternal effects in early life history traits help maintain ecological resilience in novel  
574 environments for two contrasting *Senecio* species. bioRxiv doi:  
575 <https://doi.org/10.1101/2021.02.04.429835>
- 576 Wang, S. P., and D. M. Althoff. 2019. Phenotypic plasticity facilitates initial colonization of a novel  
577 environment. Evolution 73:303-316.
- 578 Wood, C. W., and E. D. Brodie III. 2015. Environmental effects on the structure of the G-matrix. Evolution  
579 69:2927-2940.
- 580 Zeng, Z. B. 1988. Long-Term Correlated Response, Interpopulation Covariation, and Interspecific  
581 Allometry. Evolution 42:363-374.
- 582





# Using a covariance tensor to quantify differences among multiple matrices

**Original matrices**  
4 traits, 4 matrices

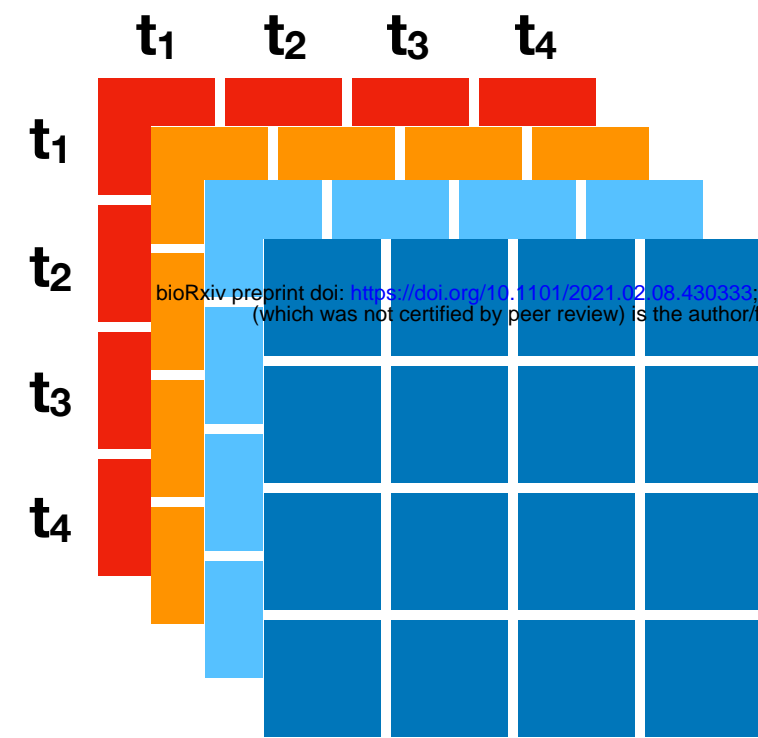

**Step 1** Construct the **S**-matrix, the element-by-element differences among all matrices (i.e. the raw differences)

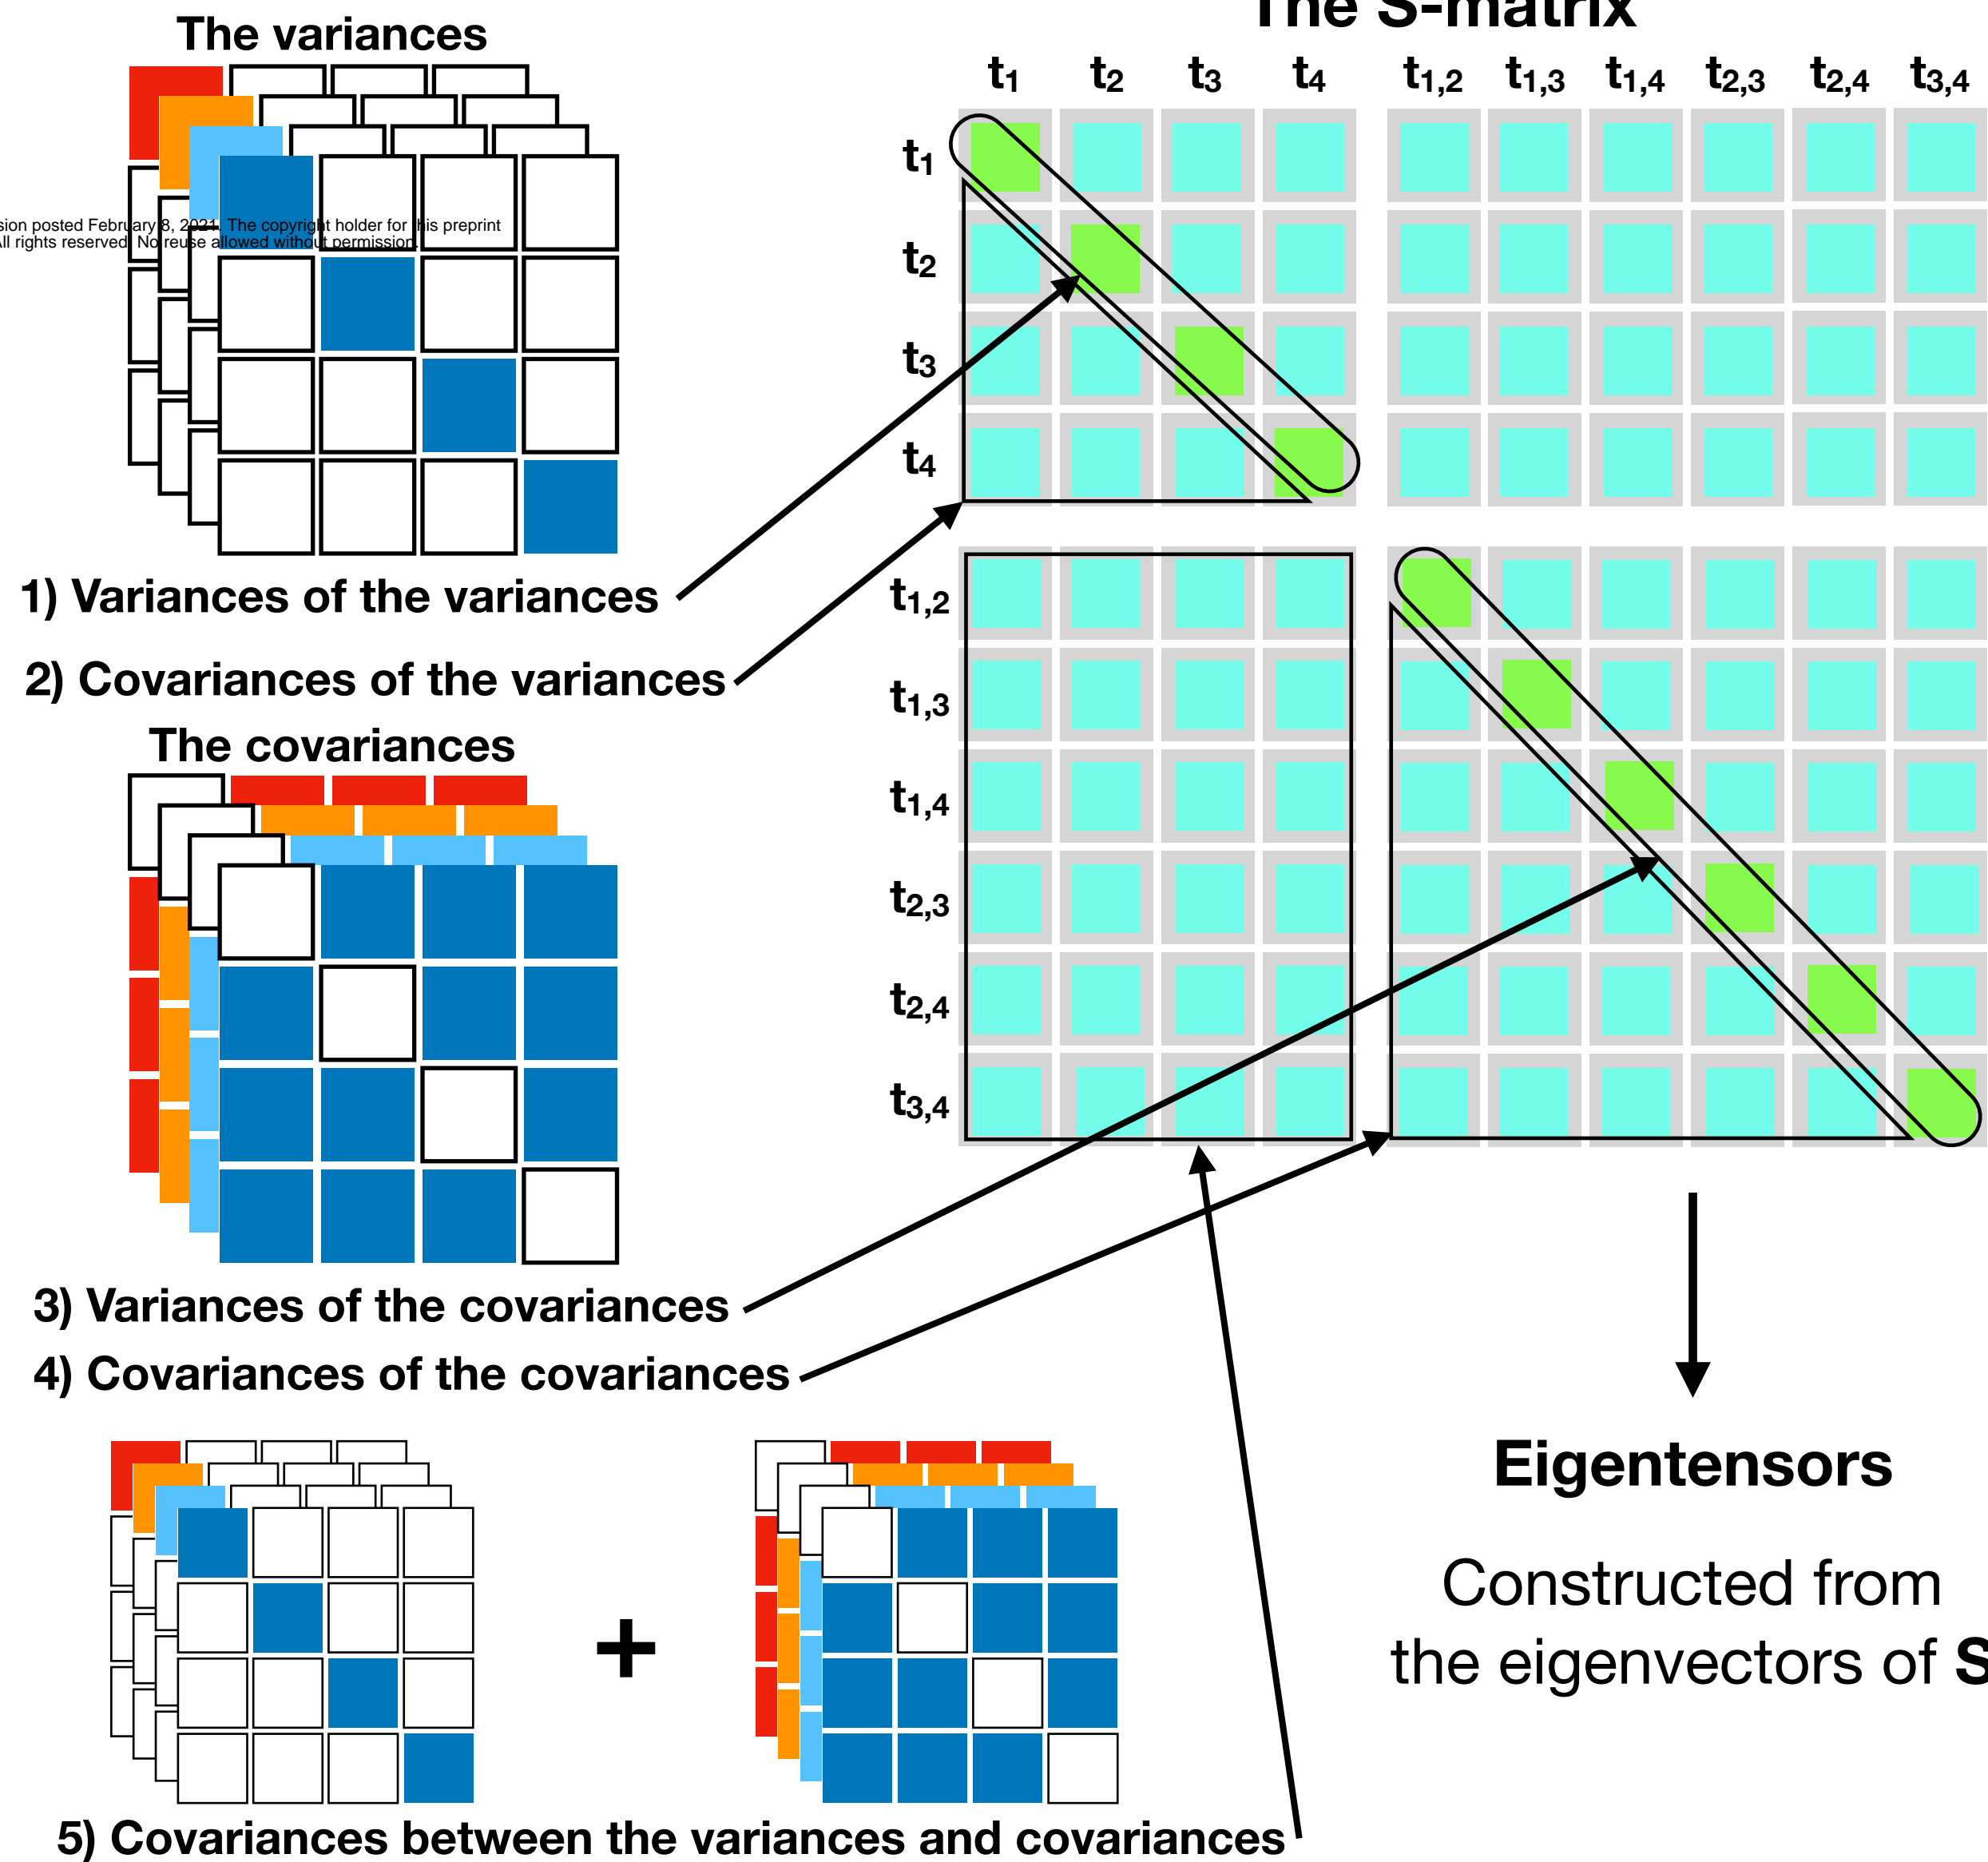

**Step 2** Construct eigentensors from the eigenvectors of **S**

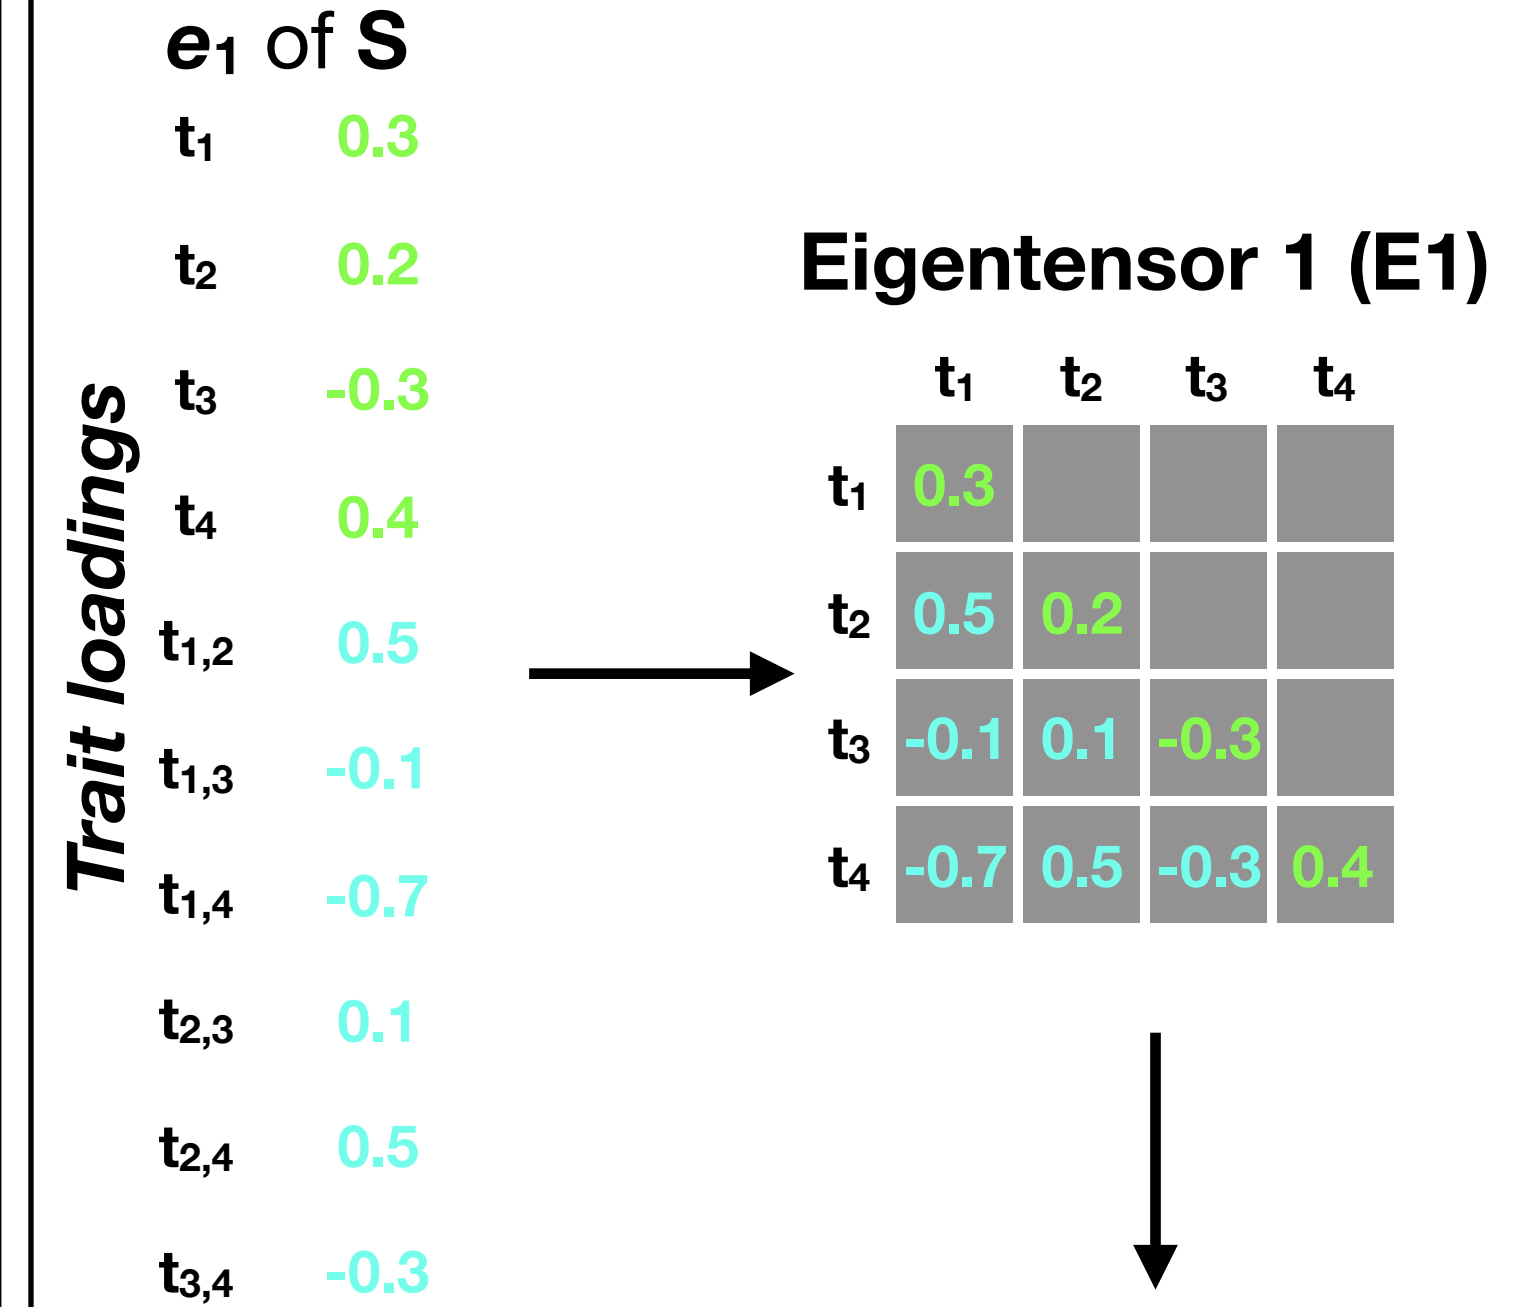

**Step 3** Identify how the original traits and matrices contribute to the differences among all matrices described by **S**

(a) **Coordinates** - which matrices correlate with the eigentensor

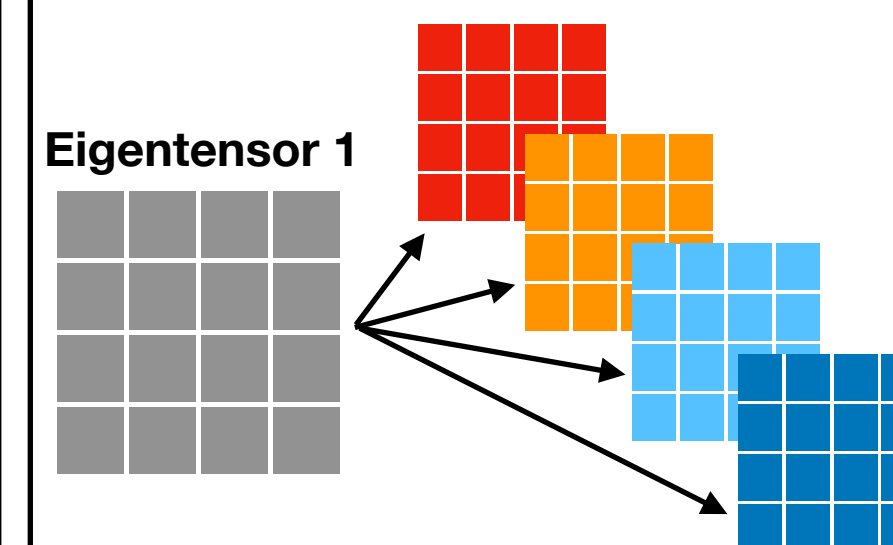

(b) **Eigenvectors of eigentensors** - how do the original traits contribute to the eigentensors

**e<sub>1</sub> of E1 (e<sub>1,1</sub>)**

| Loadings       | t <sub>1</sub> | t <sub>2</sub> | t <sub>3</sub> | t <sub>4</sub> |
|----------------|----------------|----------------|----------------|----------------|
| t <sub>1</sub> | 0.35           |                |                |                |
| t <sub>2</sub> |                | 0.02           |                |                |
| t <sub>3</sub> |                |                | -0.53          |                |
| t <sub>4</sub> |                |                |                | 0.04           |
